# Supplementary material for: Design, synthesis and antibacterial activity evaluation of ebselen derivatives in NDM-1 producing bacteria
Source: Royal Society of Chemistry journal article supplement (doi:10.1039/d4md00031e), 2024-01-01

## Supporting Information

### Design, synthesis and antibacterial activity evaluation of ebselen derivatives in NDM-1 producing bacteria

Wanli Meng <sup>a,1</sup>, Chenyu Liu <sup>b,1</sup>, Guangxin Wu <sup>a,1</sup>, Zhongyue Bai <sup>a</sup>, Zhihao Wang <sup>a</sup>,

Sheng Chen <sup>b</sup>, Shengbiao Wan <sup>a,\*</sup>, Wandong Liu <sup>a,\*</sup>

<sup>a</sup> Key Laboratory of Marine Pharmacology, Ministry of Education, College of Medicine, Ocean University of China, Qingdao 266003, China

<sup>b</sup> Faculty of Science, Hong Kong Polytechnic University, Kowloon 100872, Hong Kong, China

E-mail address: Shengbiao Wan, Professor, [biaowan@ouc.edu.cn](mailto:biaowan@ouc.edu.cn).

E-mail address: Wandong Liu, [13003083585@163.com](mailto:13003083585@163.com)

<sup>1</sup> Co-first authors.

*tert*-butyl (3-(3-oxobenzo[d][1,2]selenazol-2(3H)-yl)propyl)carbamate (**A1**)

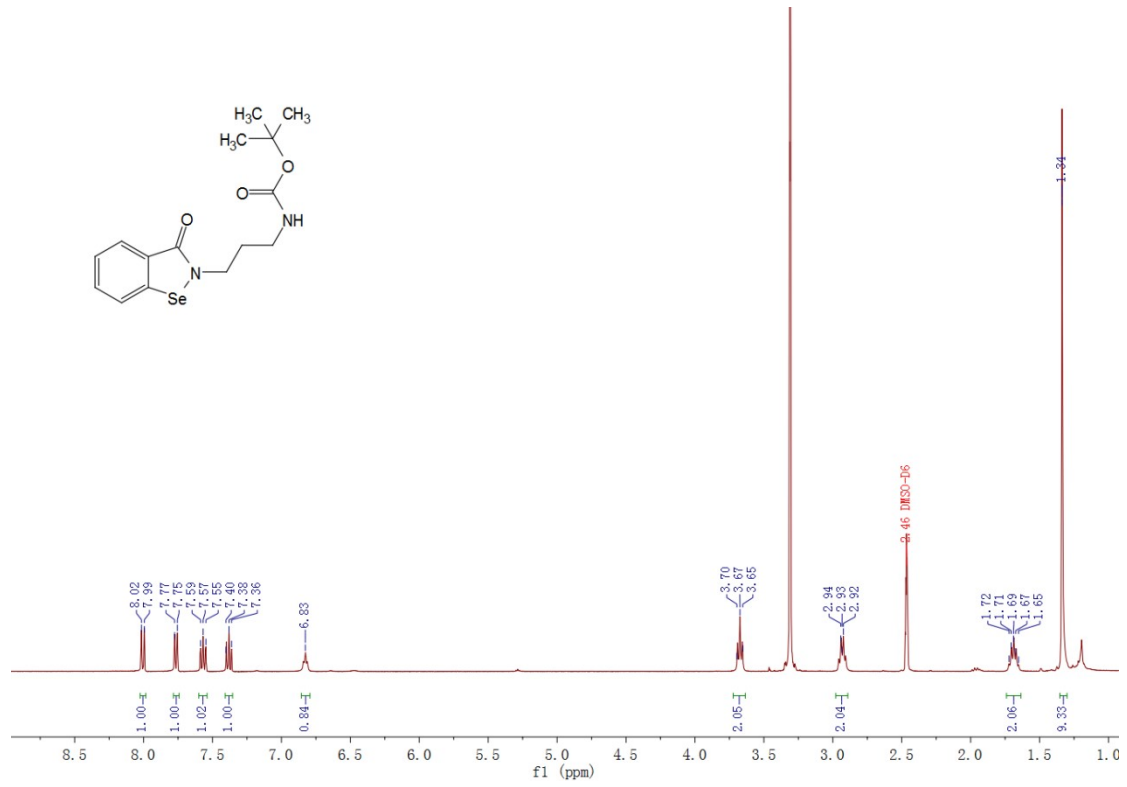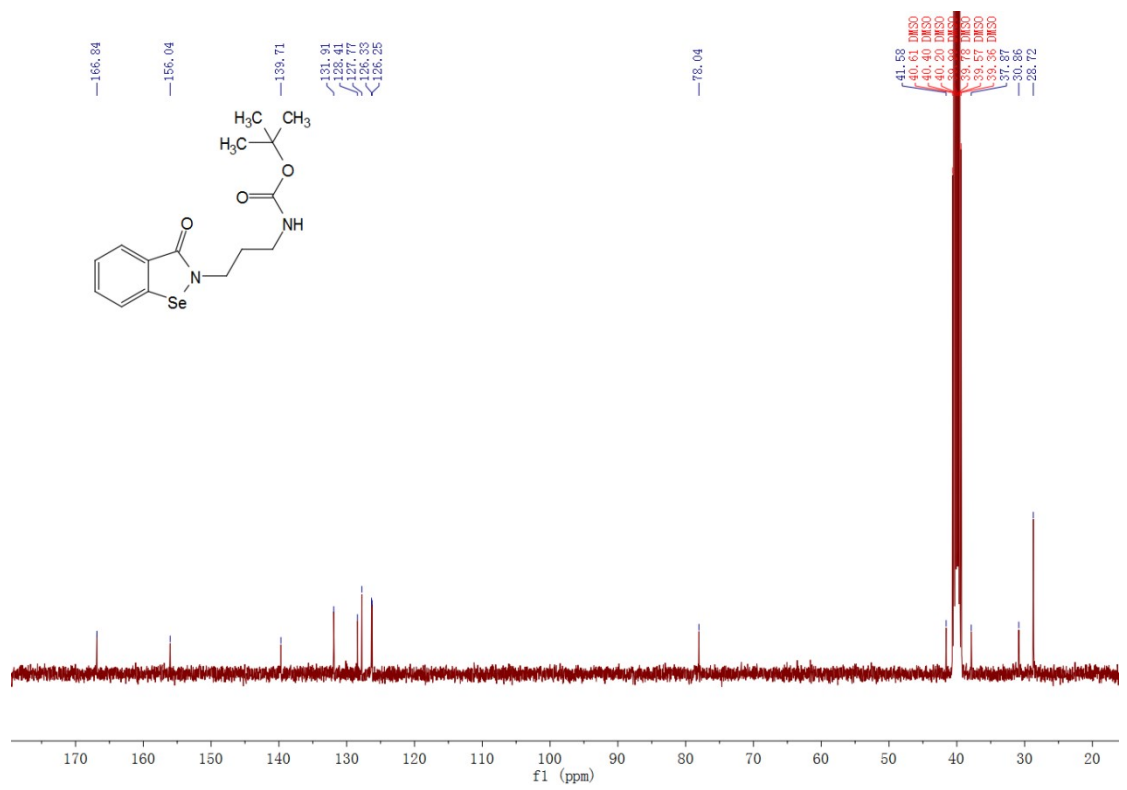

*tert*-butyl (4-(3-oxobenzod[1,2]selenazol-2(3H)-yl)butyl)carbamate (A2)

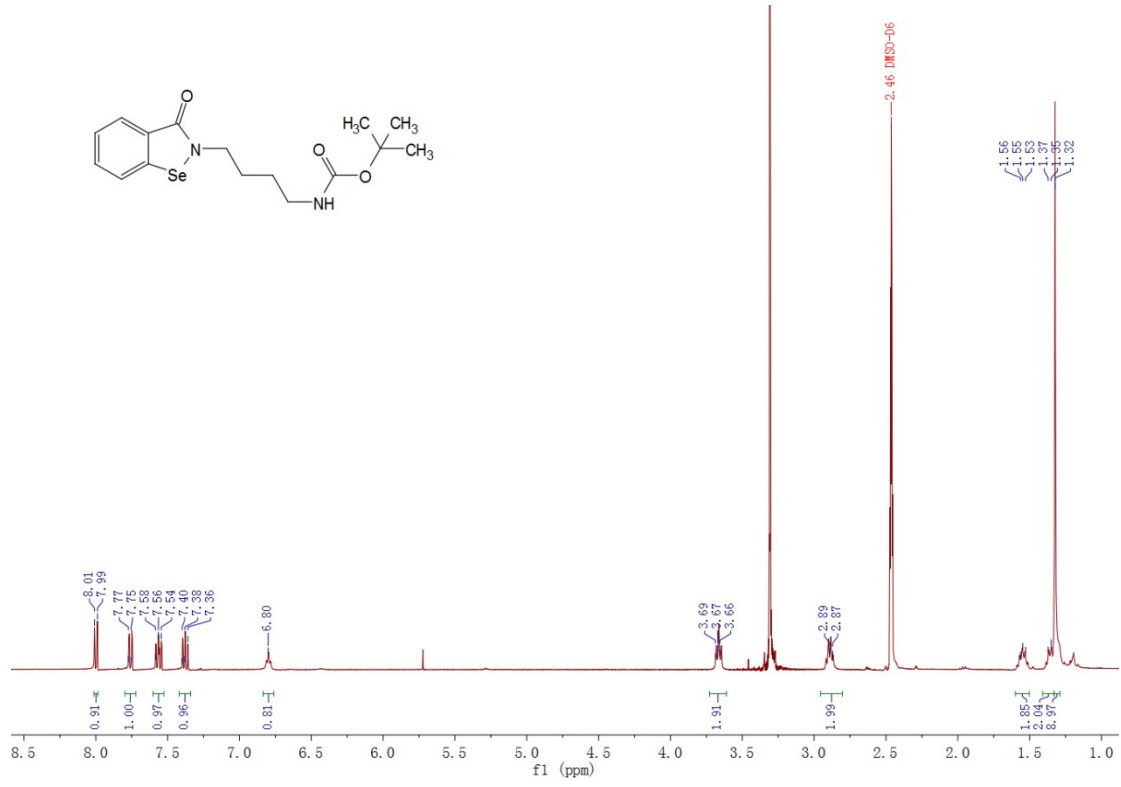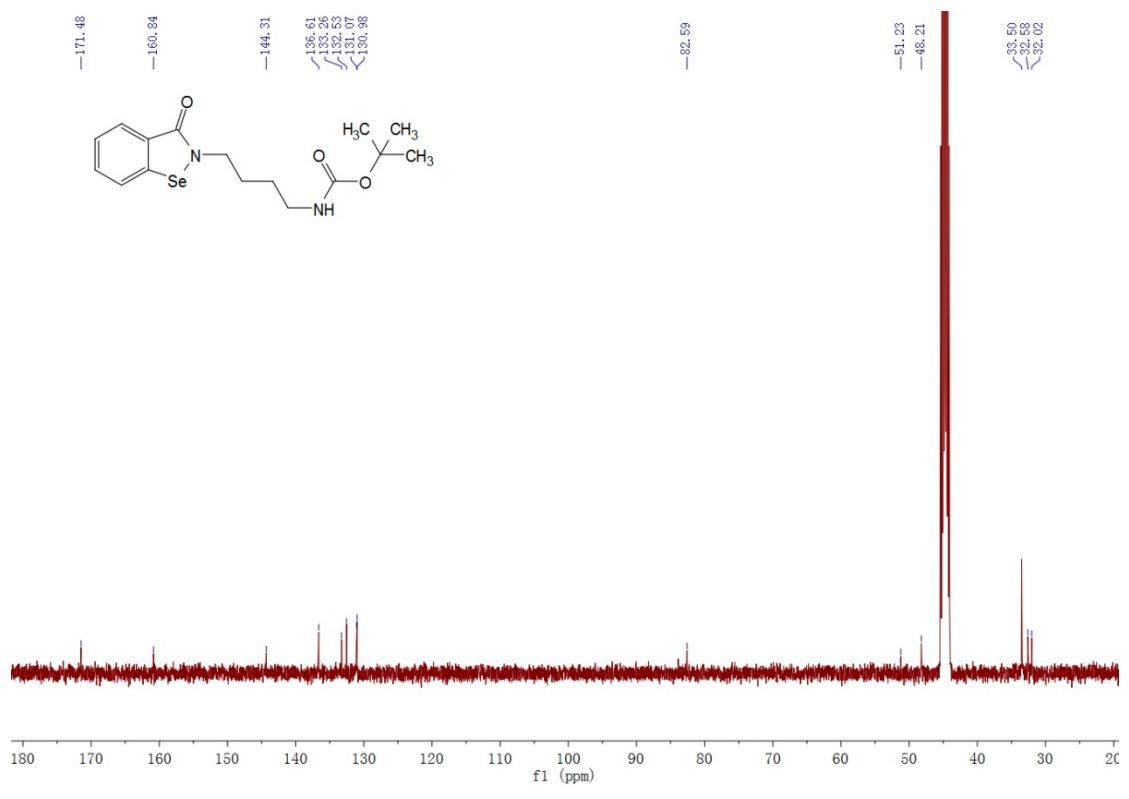

*tert*-butyl (5-(3-oxobenzod[1,2]selenazol-2(3H)-yl)amyl)carbamate (**A3**)

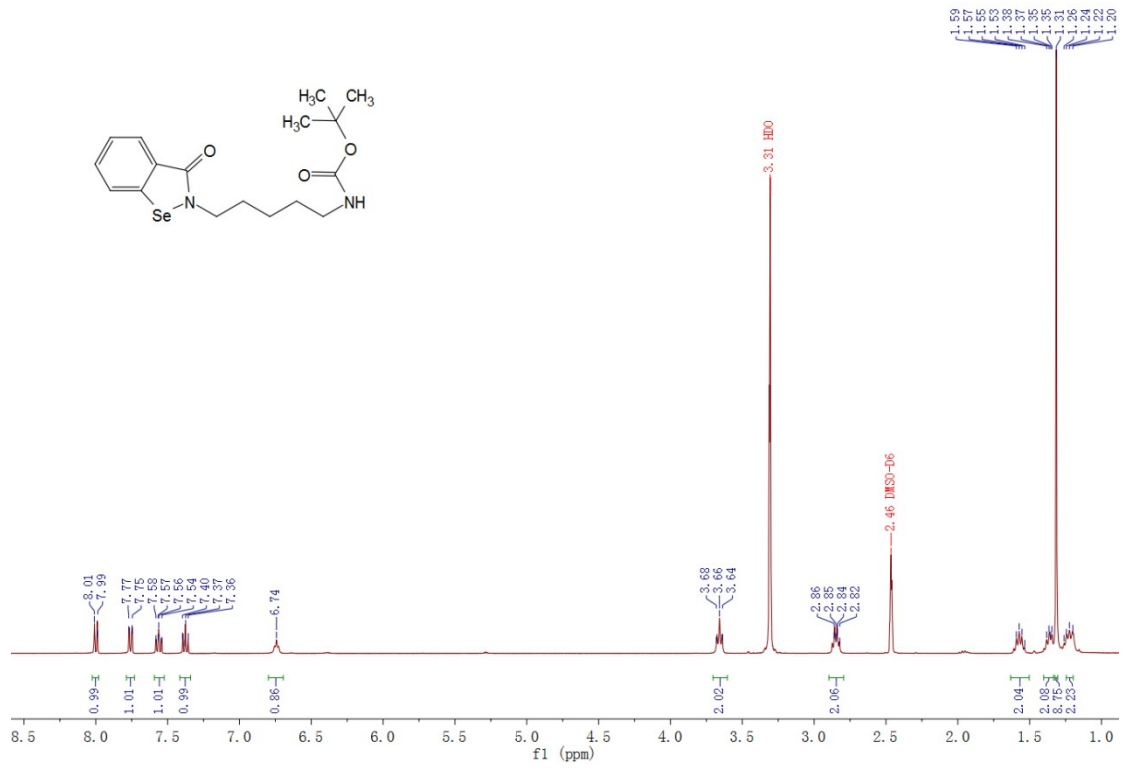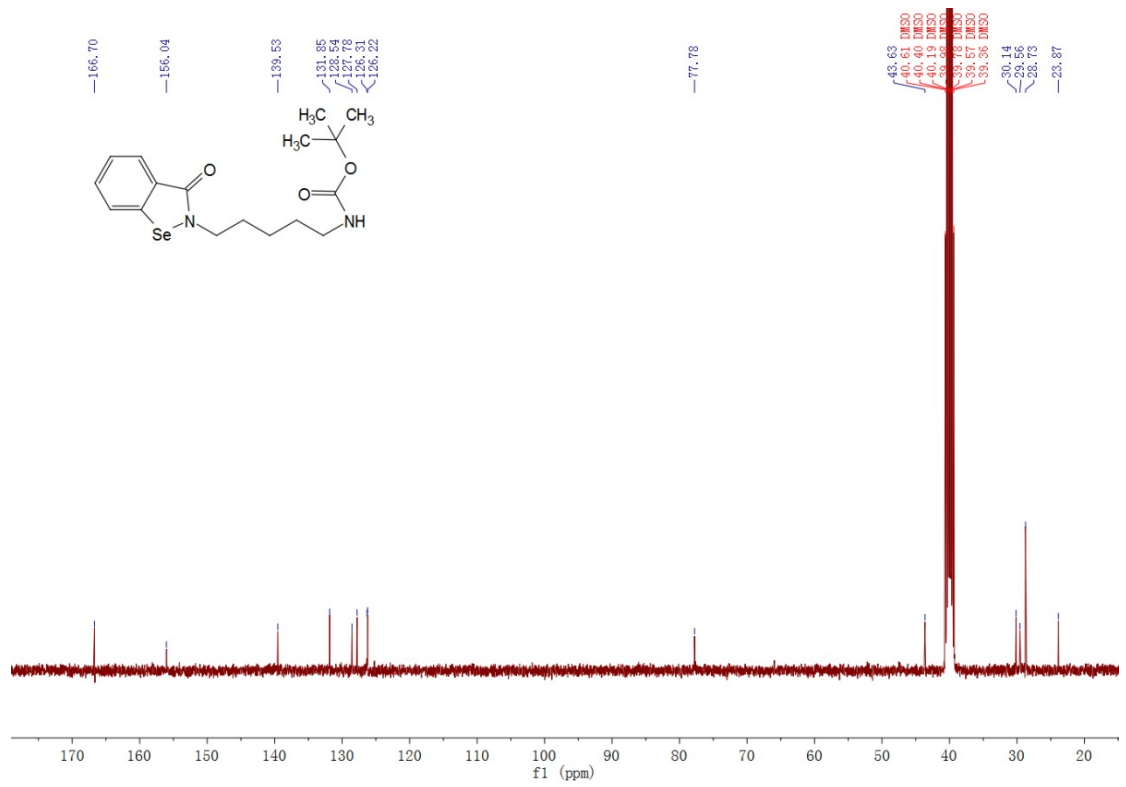

*tert*-butyl (6-(3-oxobenzod[1,2]selenazol-2(3H)-yl)hexyl)carbamate (**A4**)

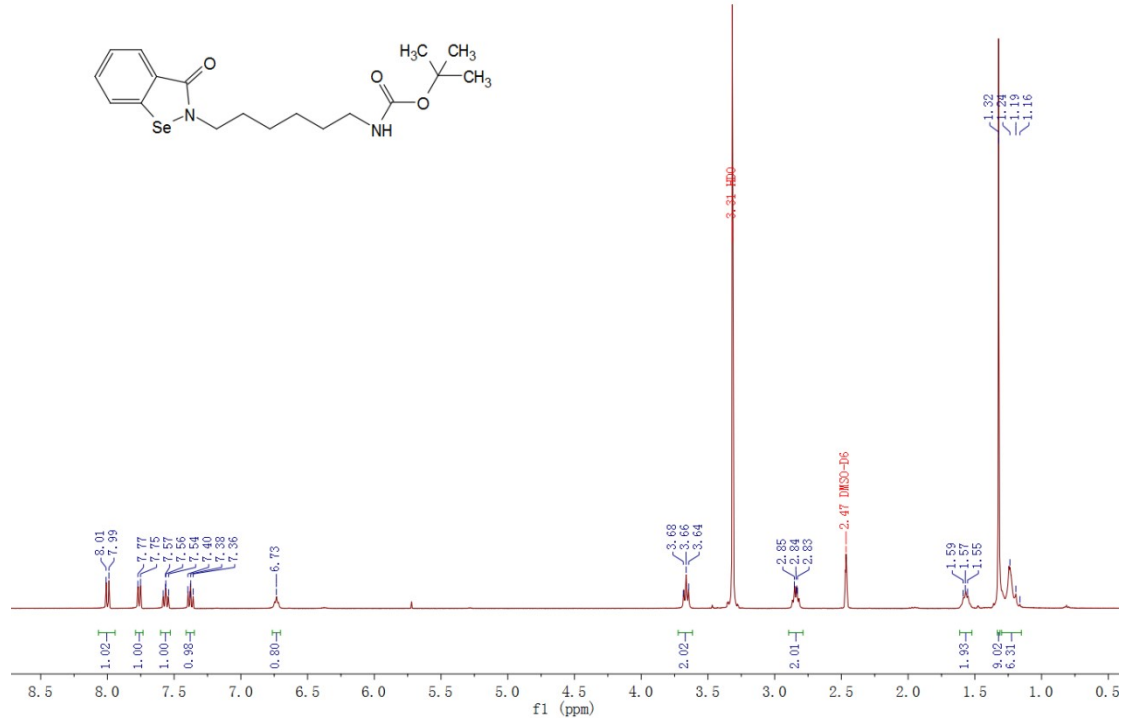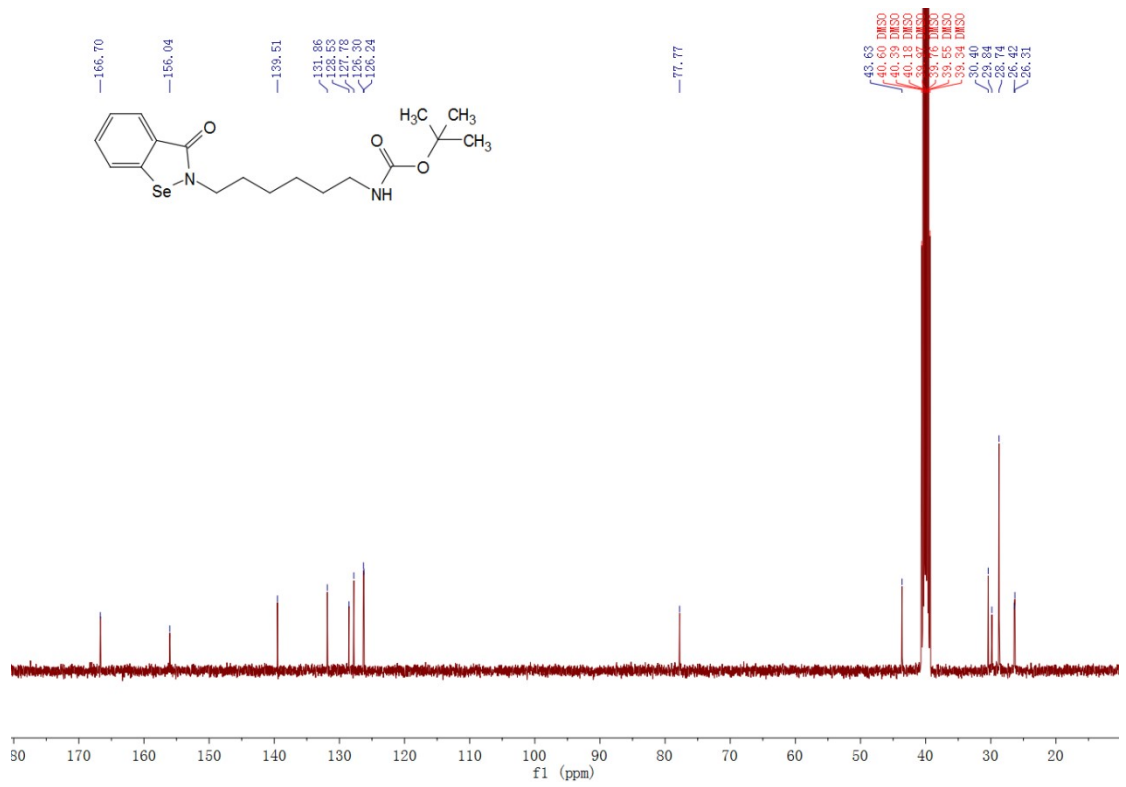

*(R)*-tert-butyl-3-(3-oxobenzo[d][1,2]selenazol-2(3H)-yl)pyrrolidine-1-carboxylate

(A5)

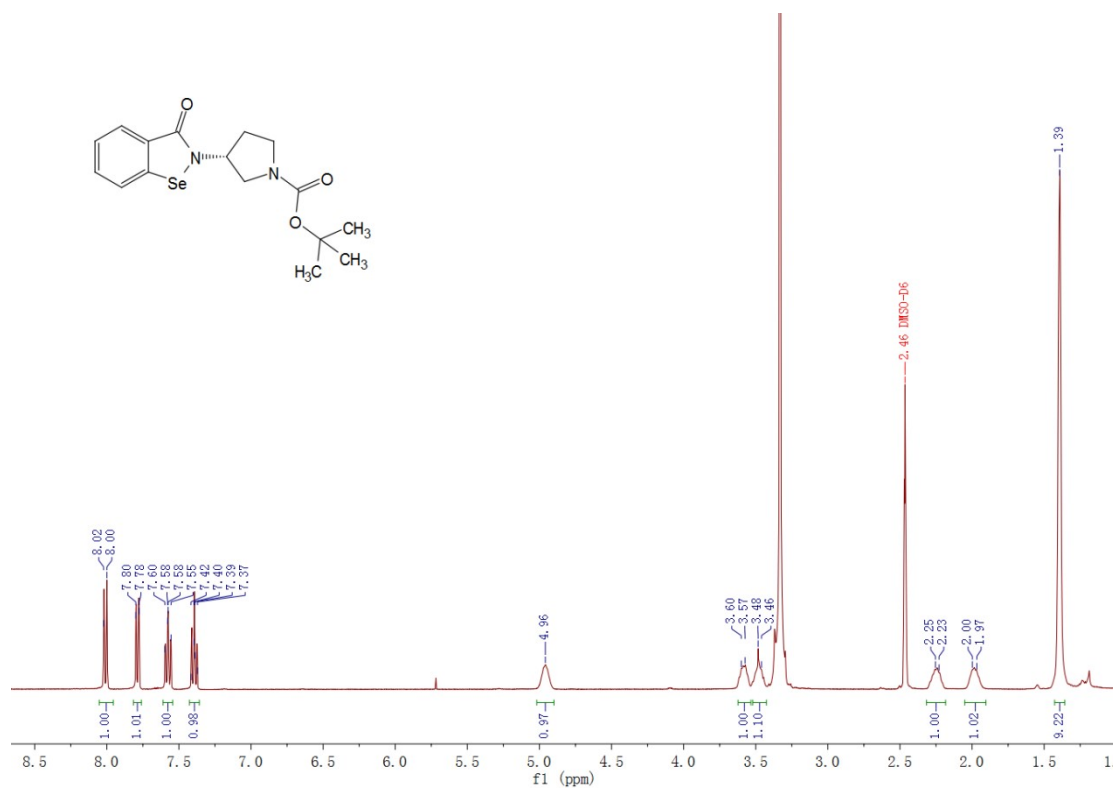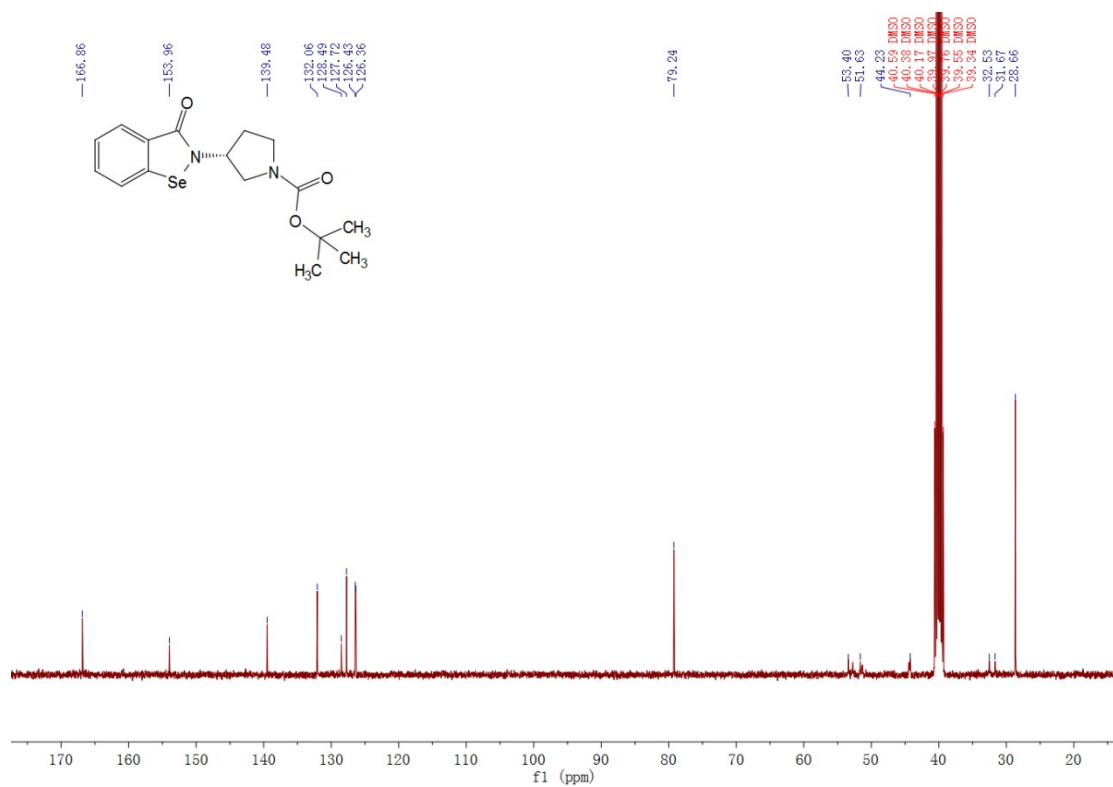

*tert*-butyl 4-(3-oxobenzod[1,2]selenazol-2(3H)-yl)piperidine-1-carboxylate (**A6**)

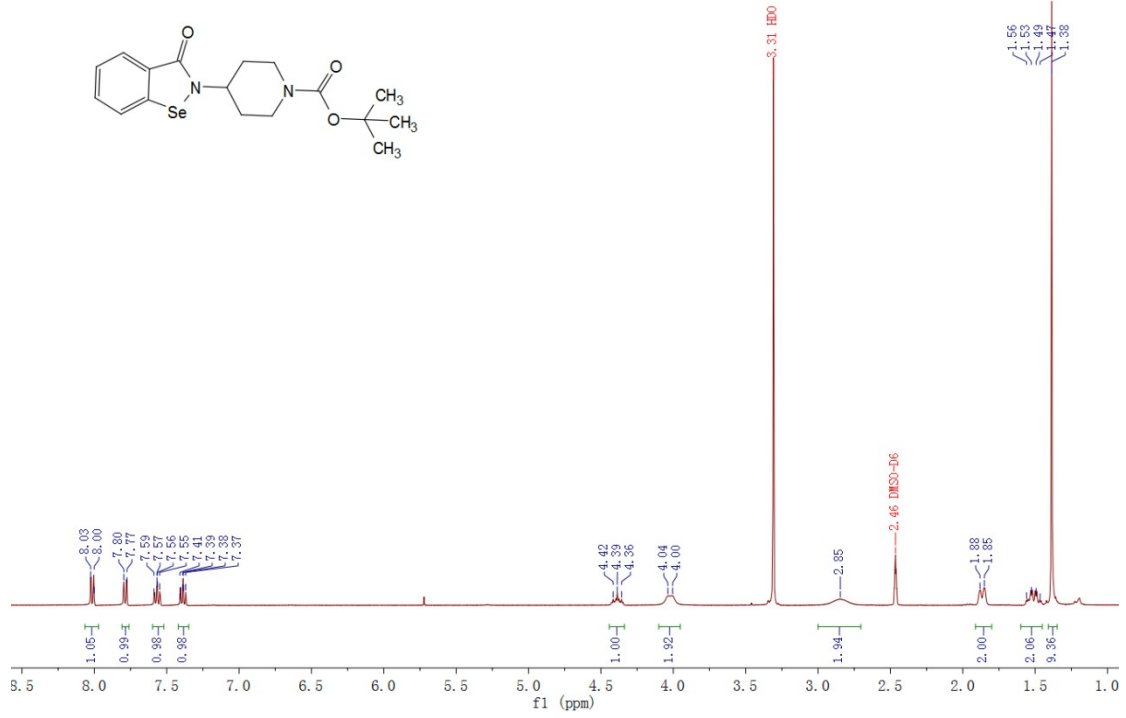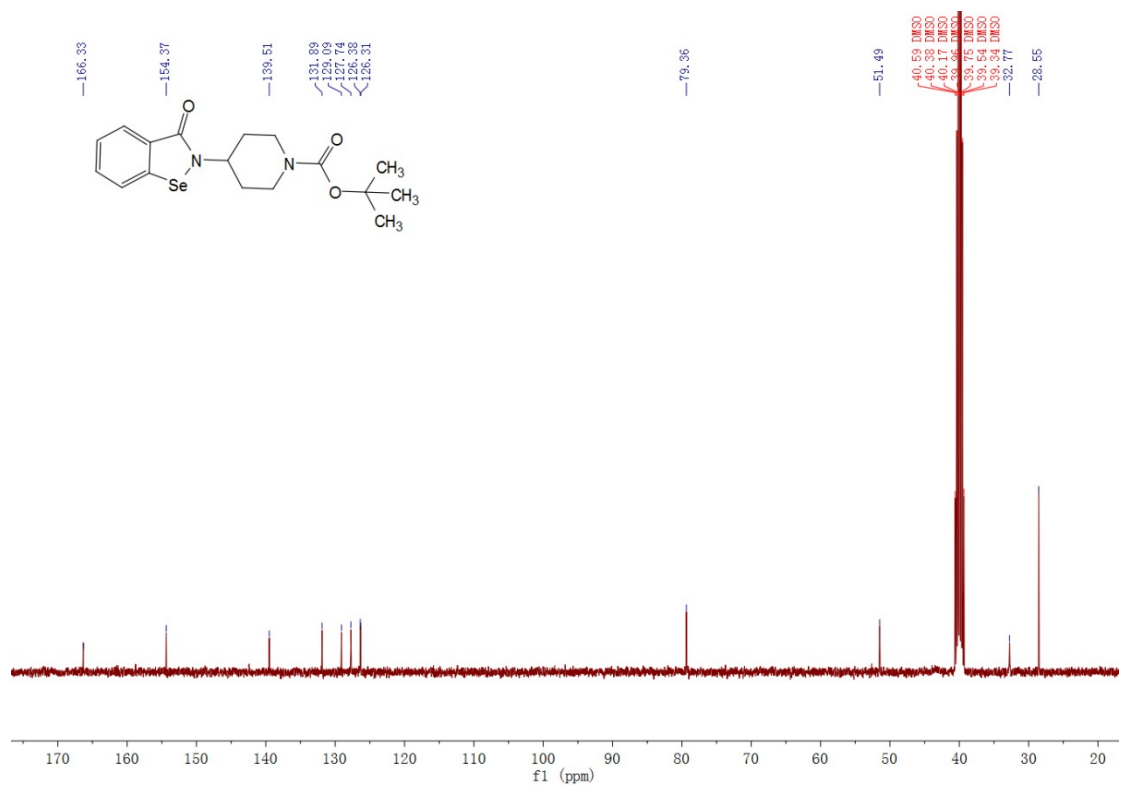

*methyl 3-(3-oxobenzod[1,2]selenazol-2(3H)-yl)benzoate (A7)*

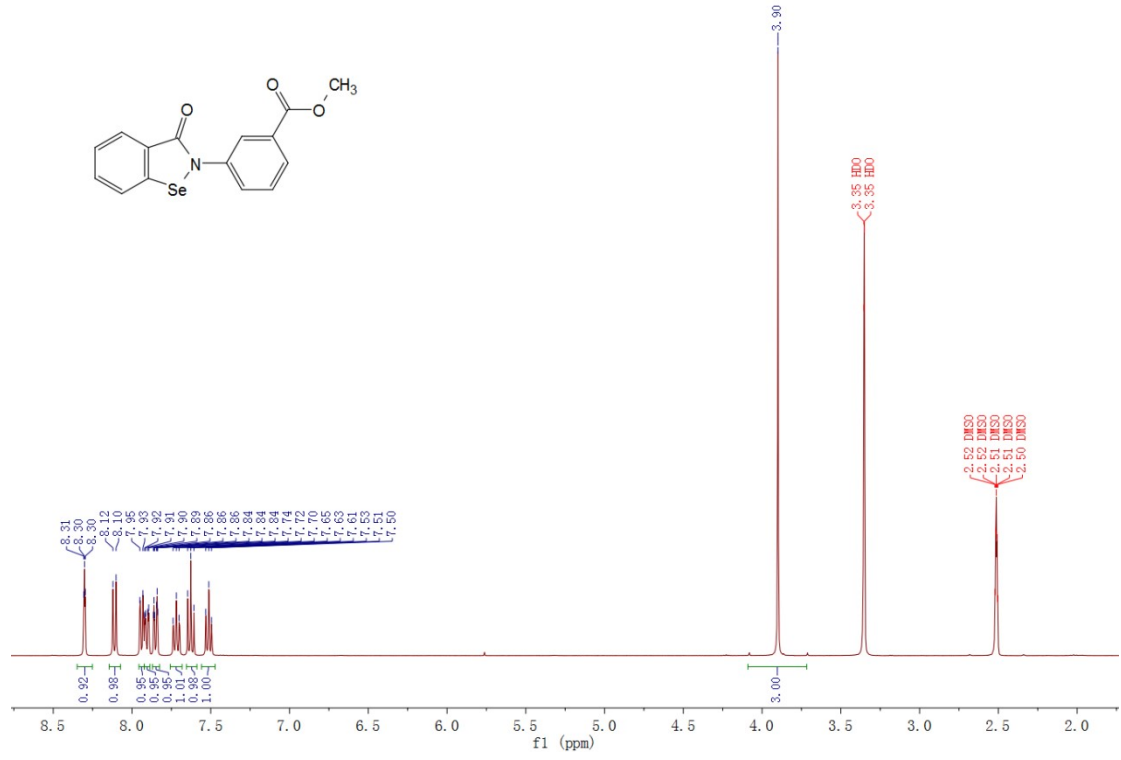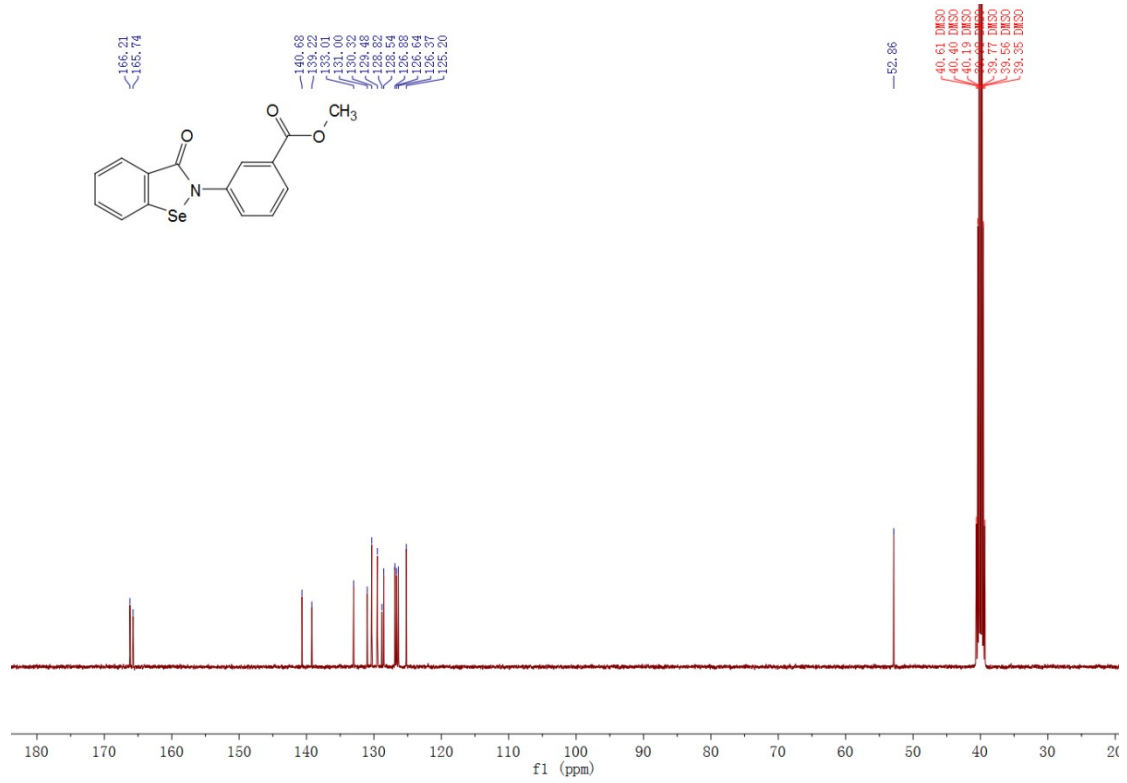



methyl 2-methyl-4-(3-oxobenzodiselenazol-2(3H)-yl)benzoate (A8)

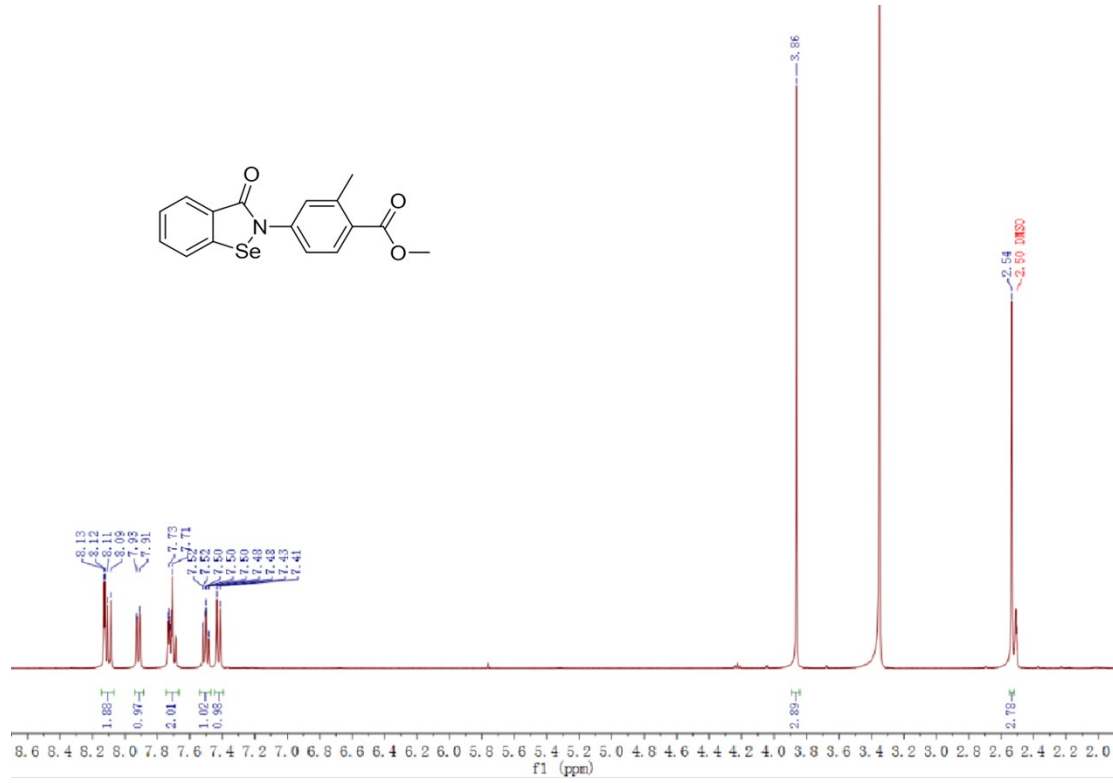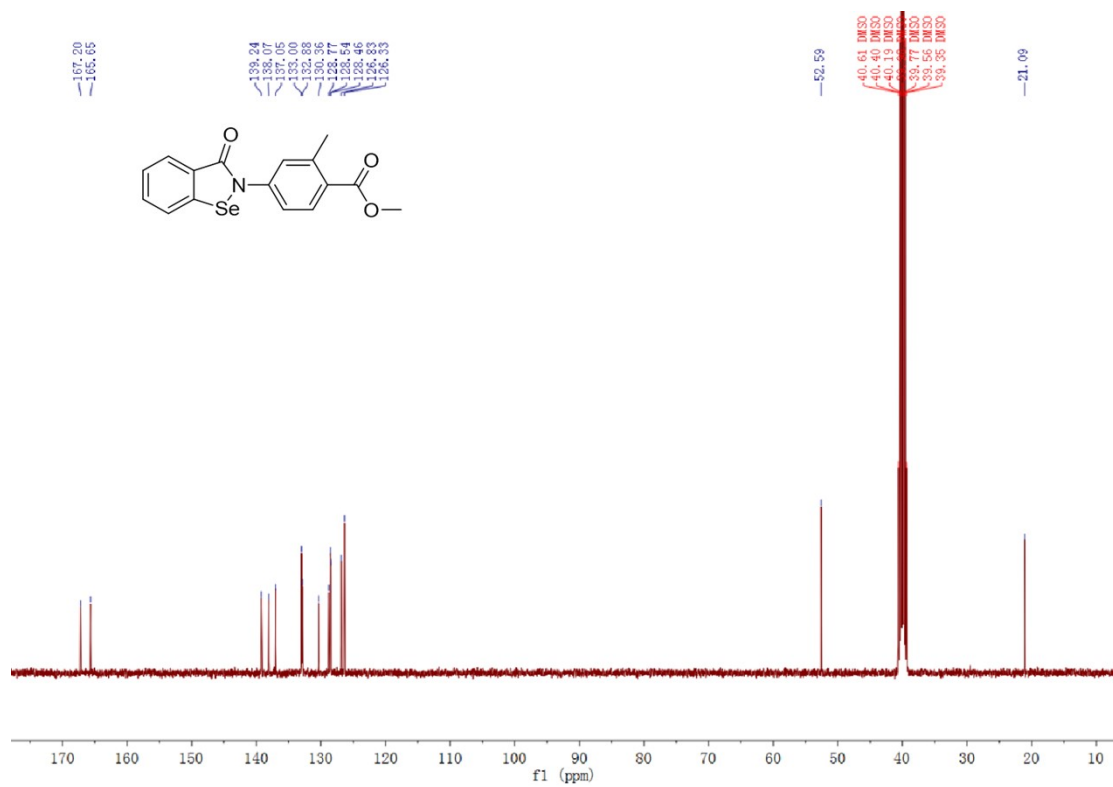

*methyl 2-methoxy-4-(3-oxobenzod[1,2]selenazol-2(3H)-yl)benzoate (A9)*

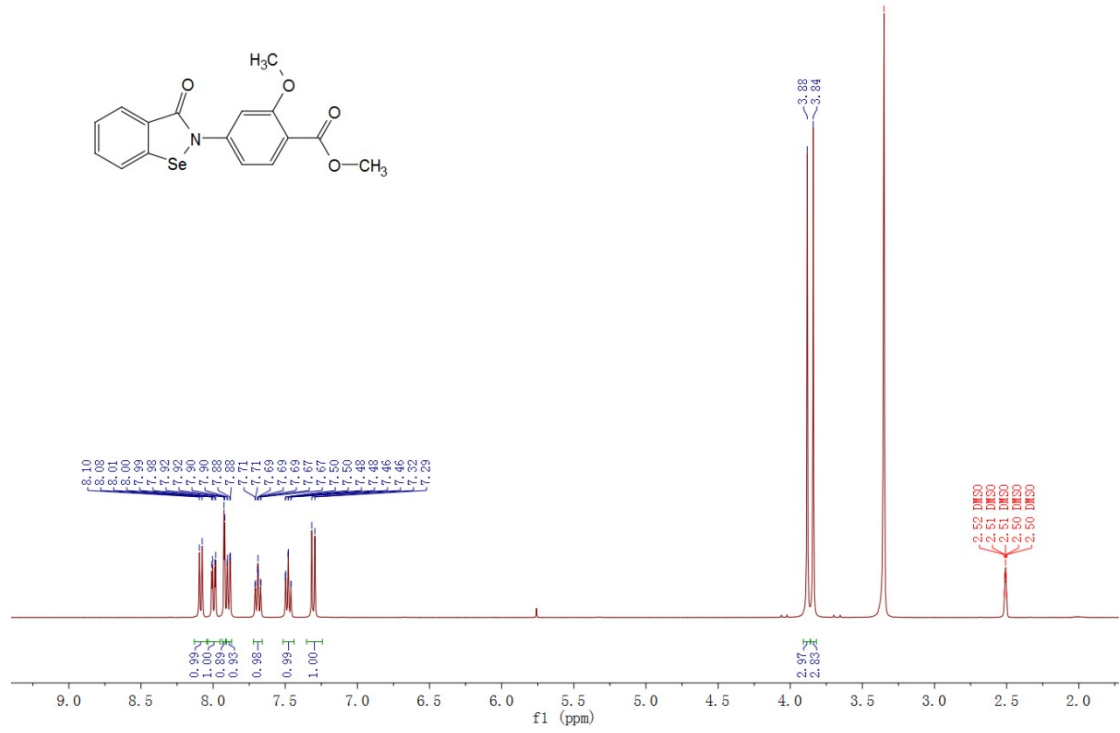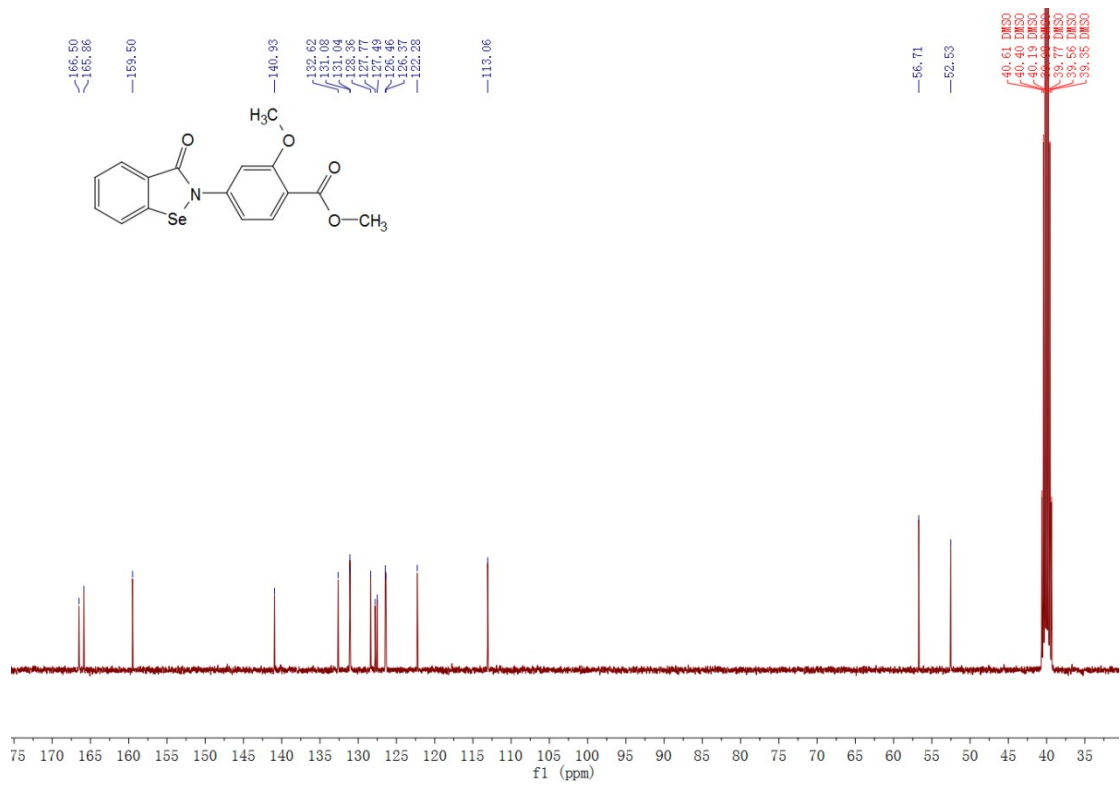

2-([1,1'-biphenyl]-4-yl)benzo[d][1,2]selenazol-3(2H)-one (A10)

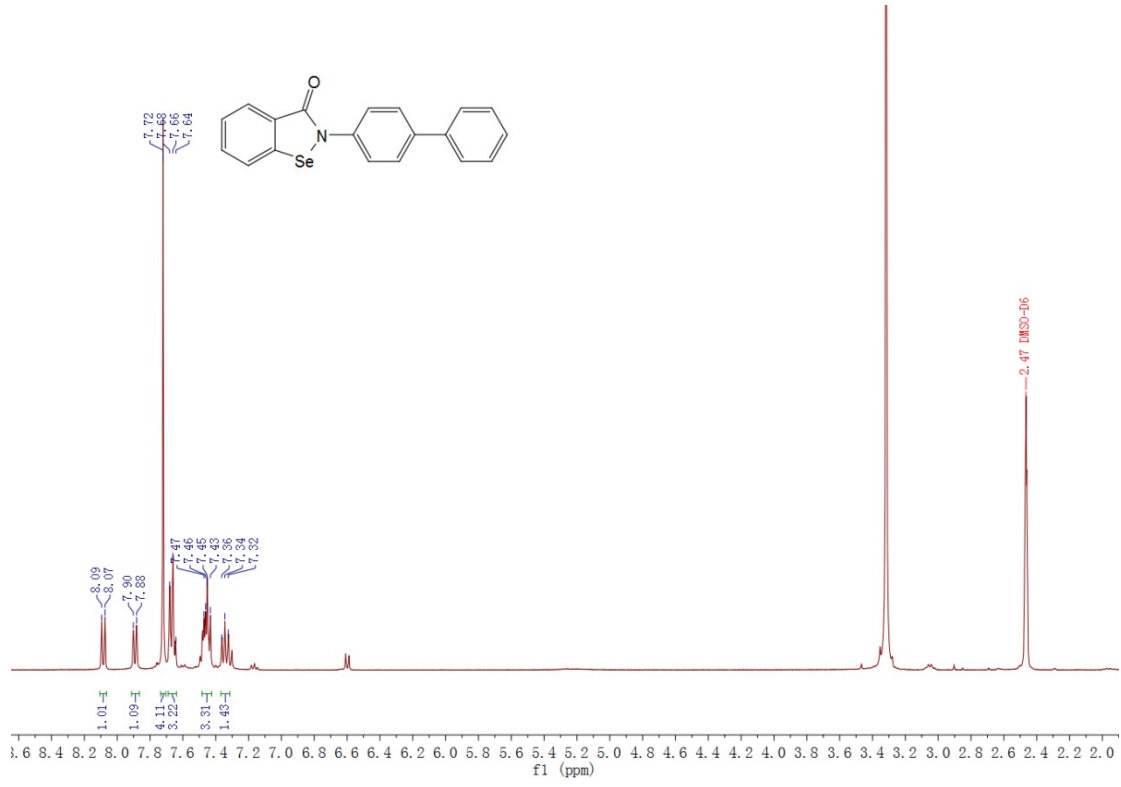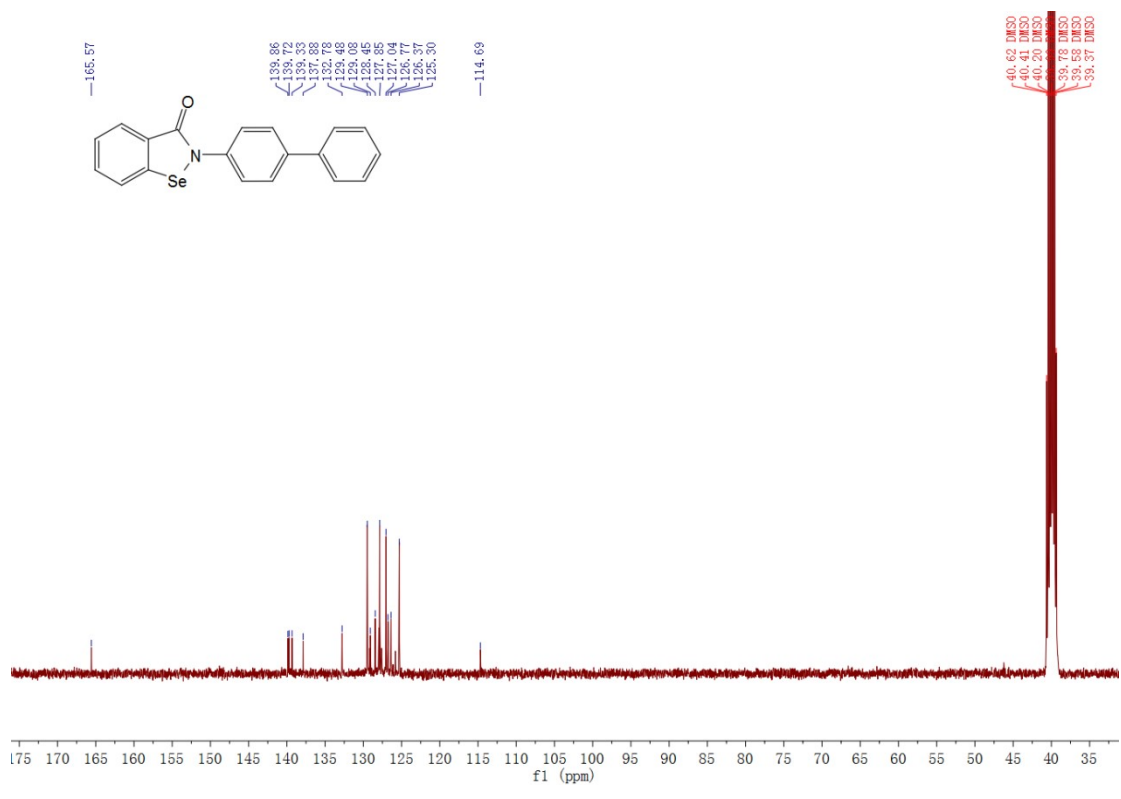

2-(4-ethylphenyl)benzo[d][1,2]selenazol-3(2H)-one (A11)

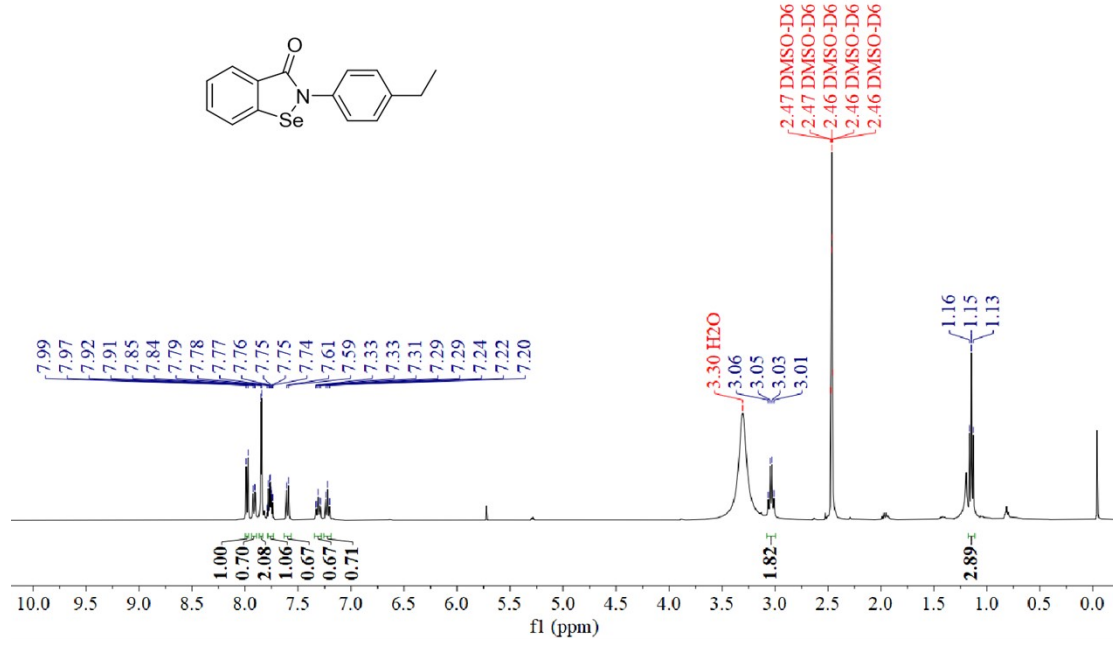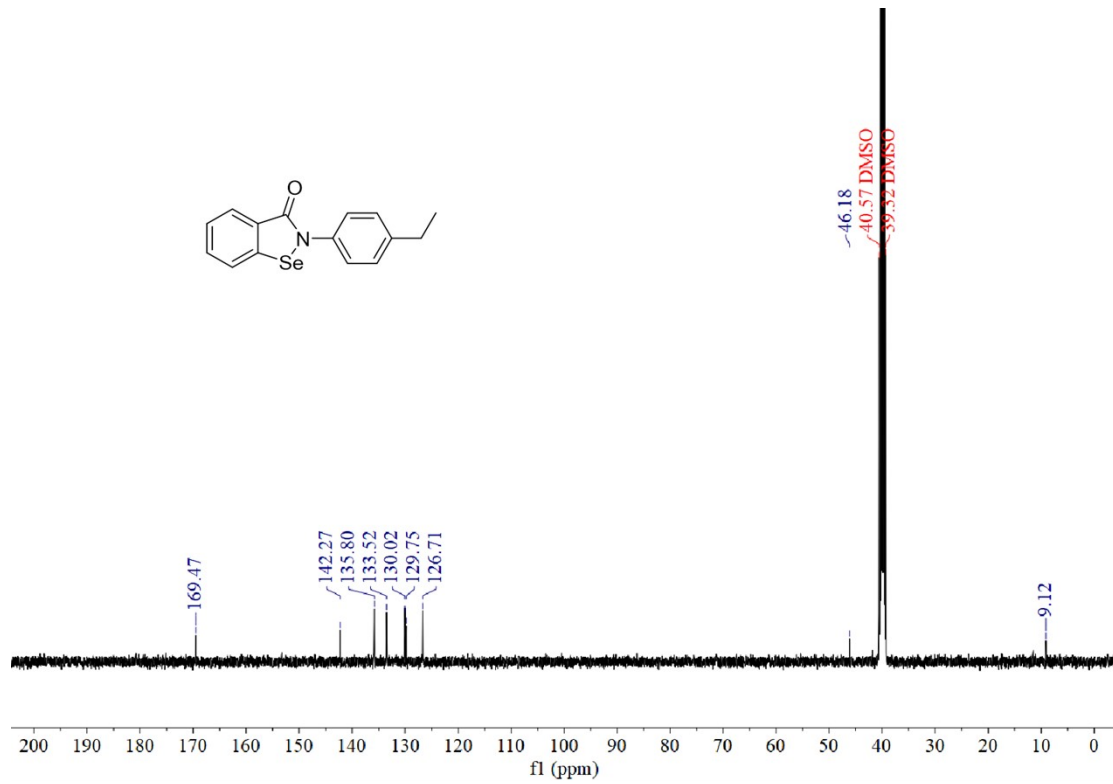

2-(4-(methylsulfonyl)phenyl)benzo[d][1,2]selenazol-3(2H)-one (A12)

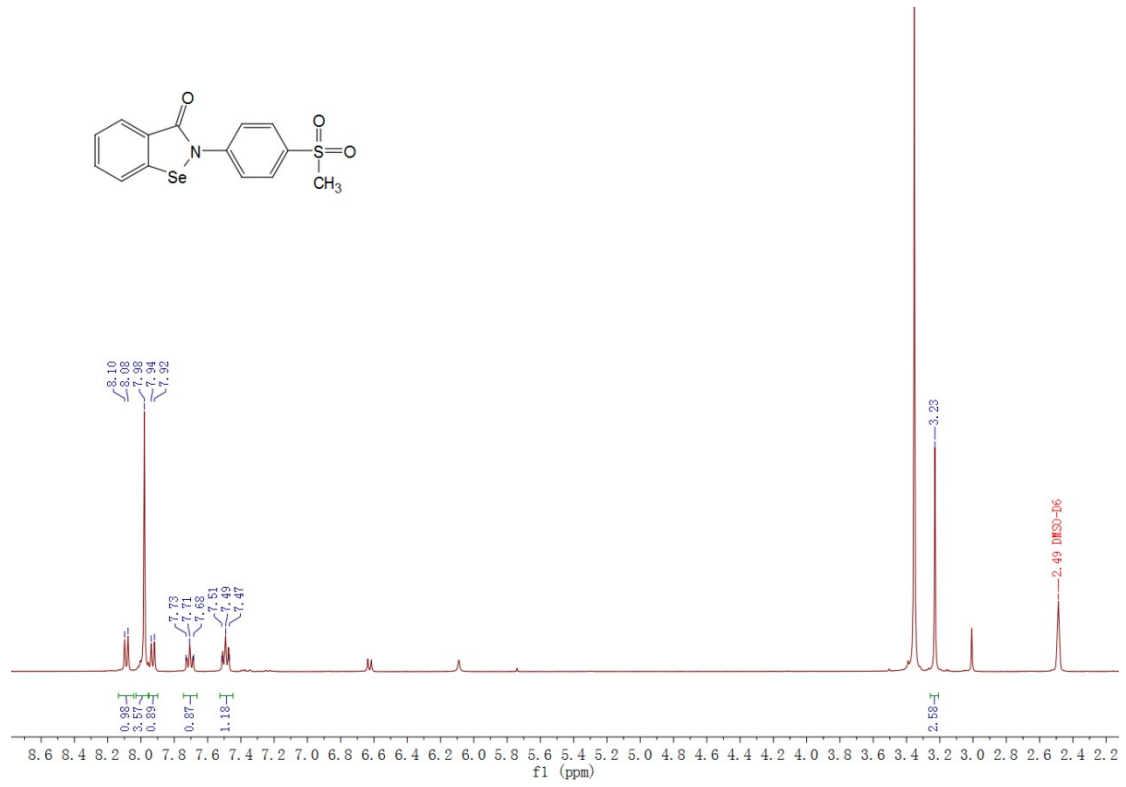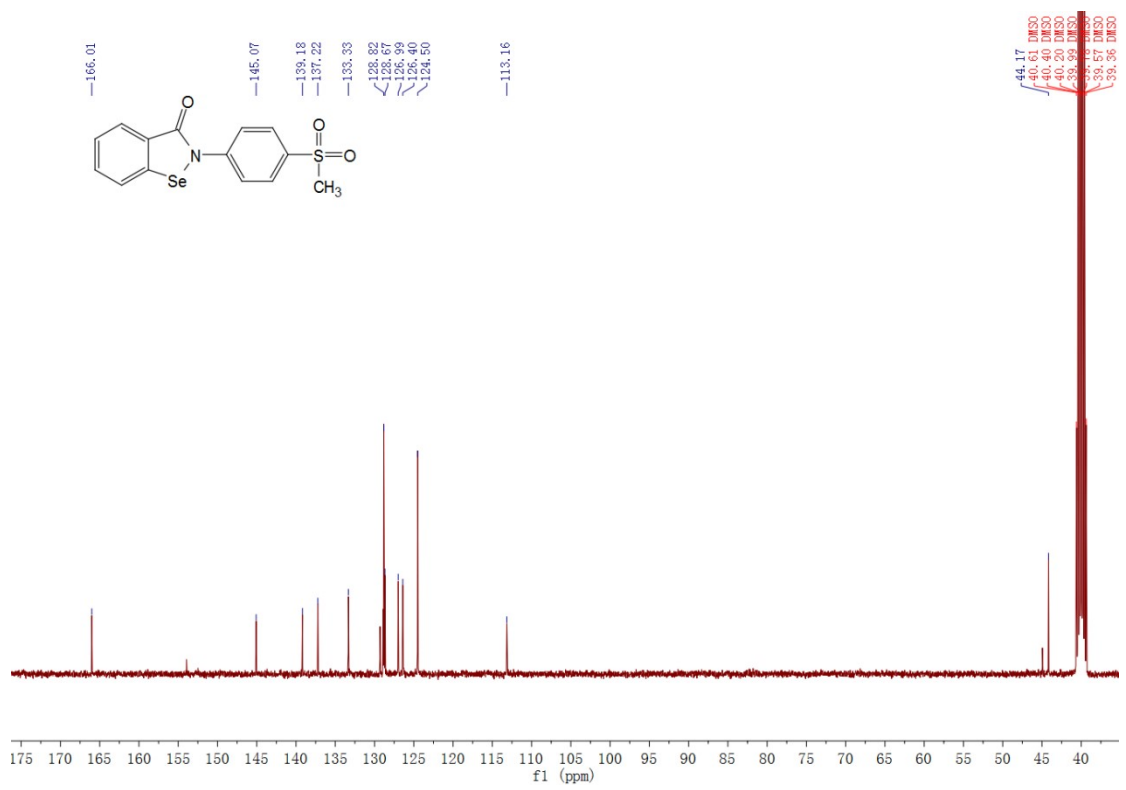

2-(5-(methylthio)-1,3,4-thiadiazol-2-yl)benzo[d][1,2]selenazol-3(2H)-one (A13)

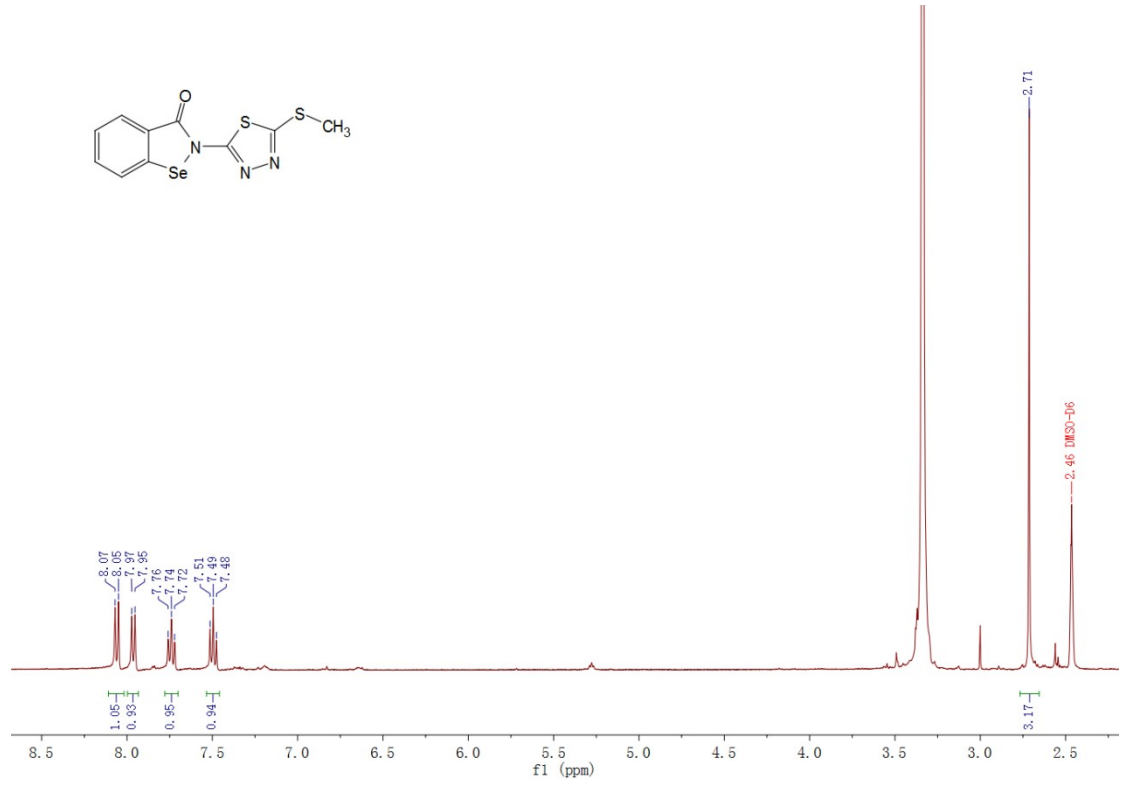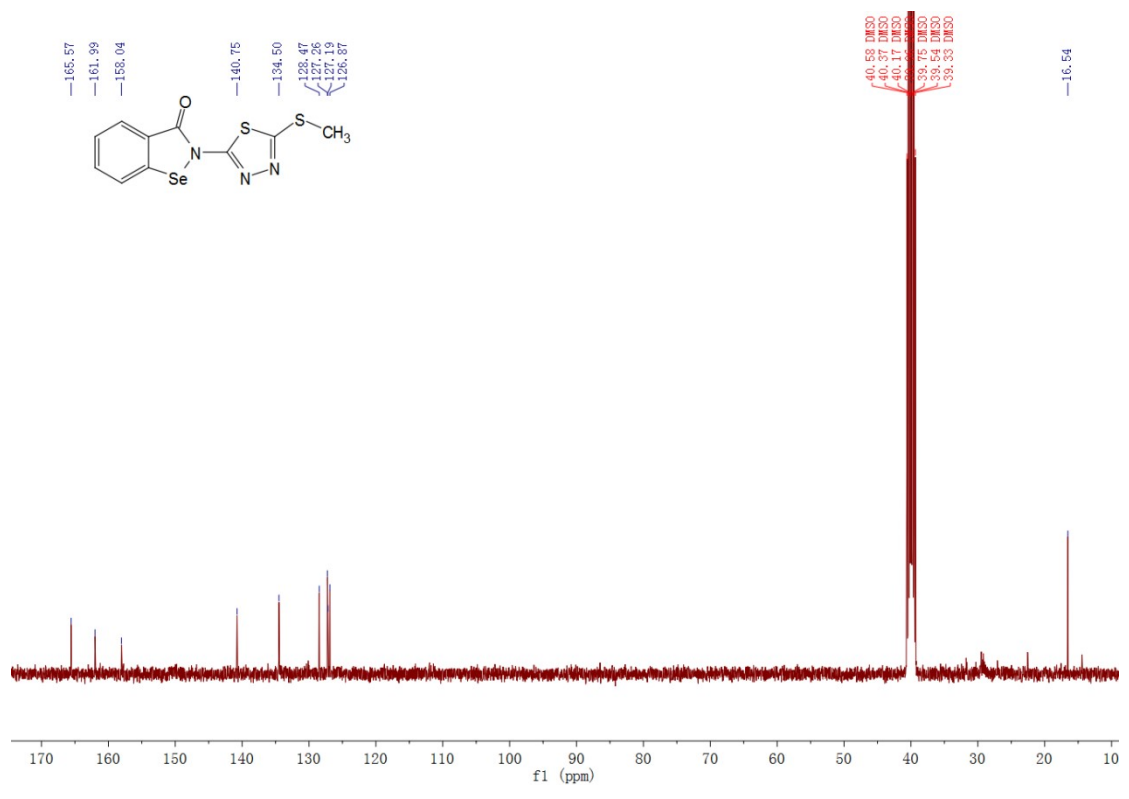

*N*-(2-(3-oxobenzo[*d*][1,2]selenazol-2(3*H*)-yl)ethyl)pivalamide (**A14**)

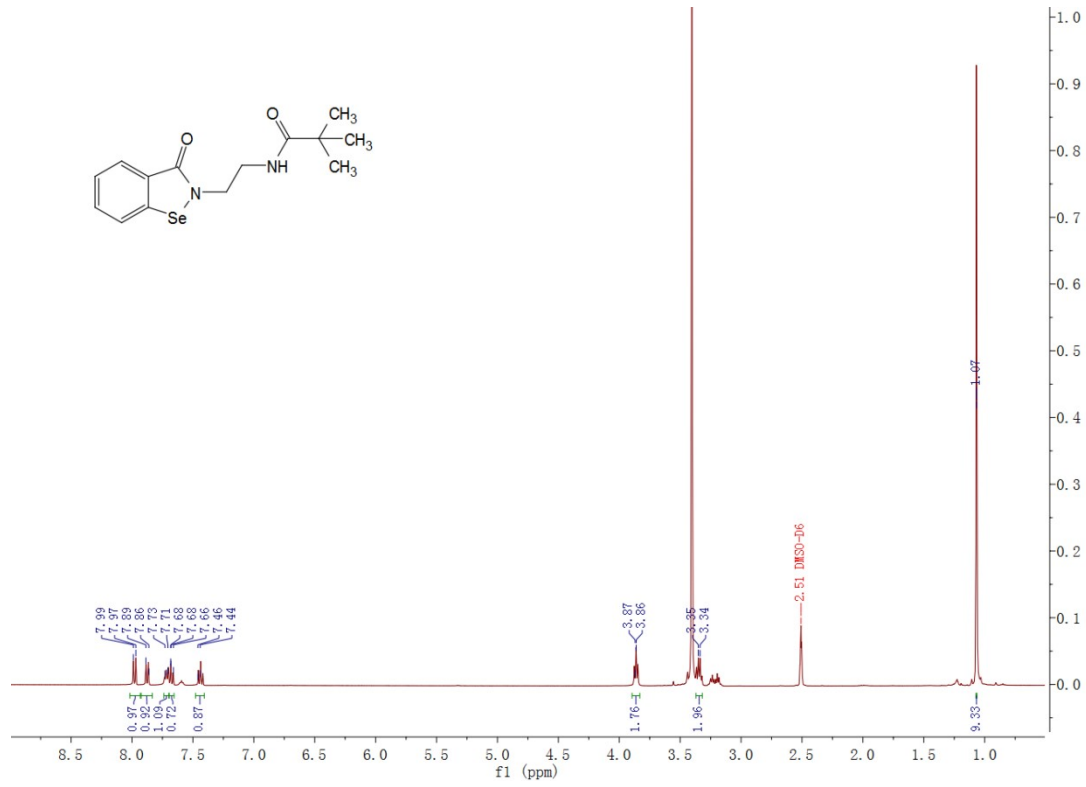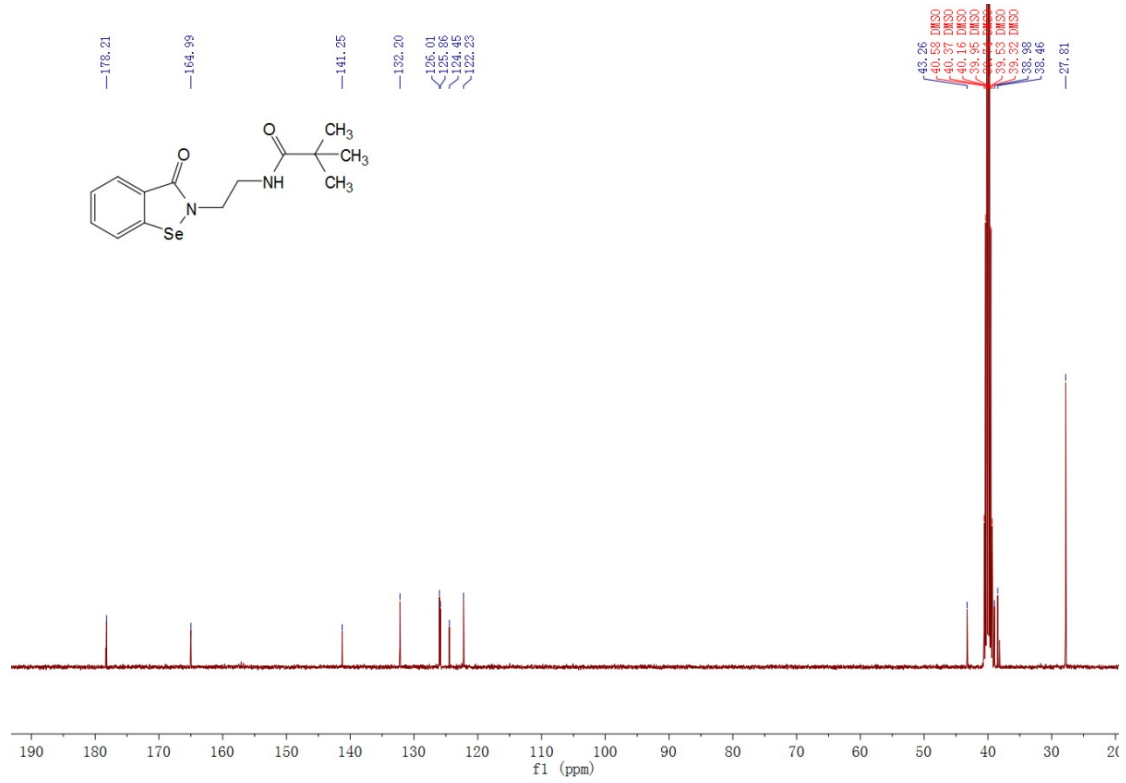

*N*-(3-(3-oxobenzod[1,2]selenazol-2(3H)-yl)propyl)pivalamide (A15)

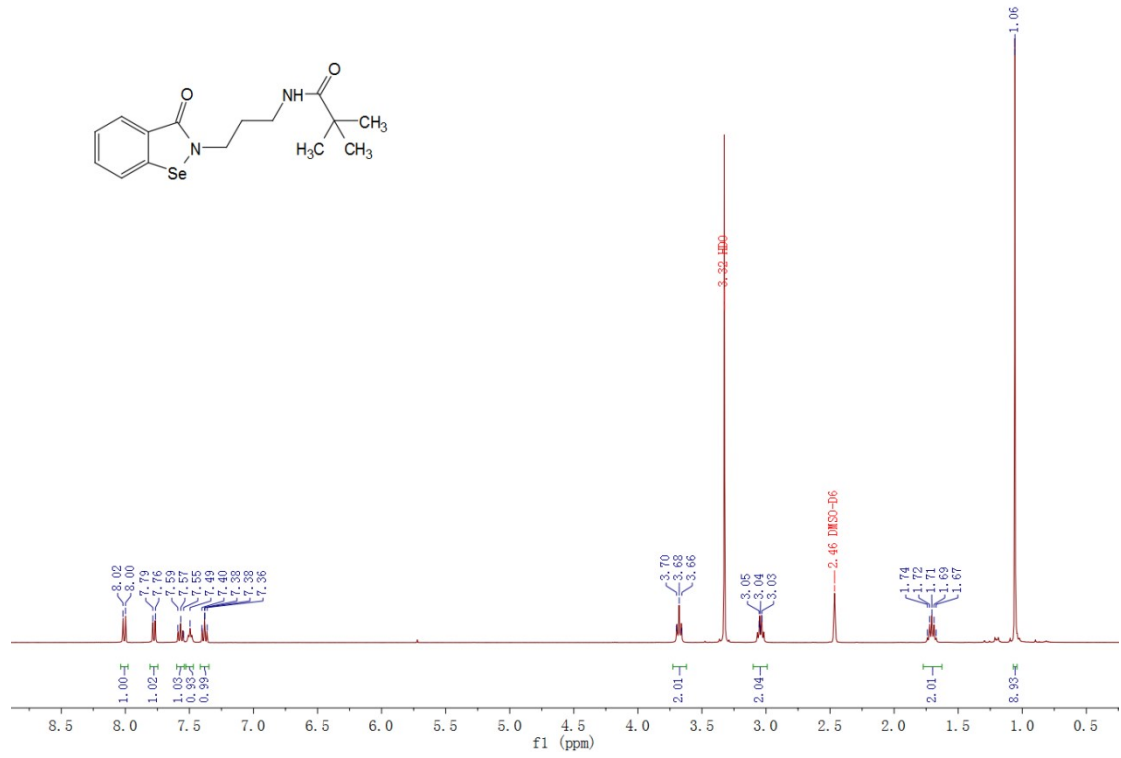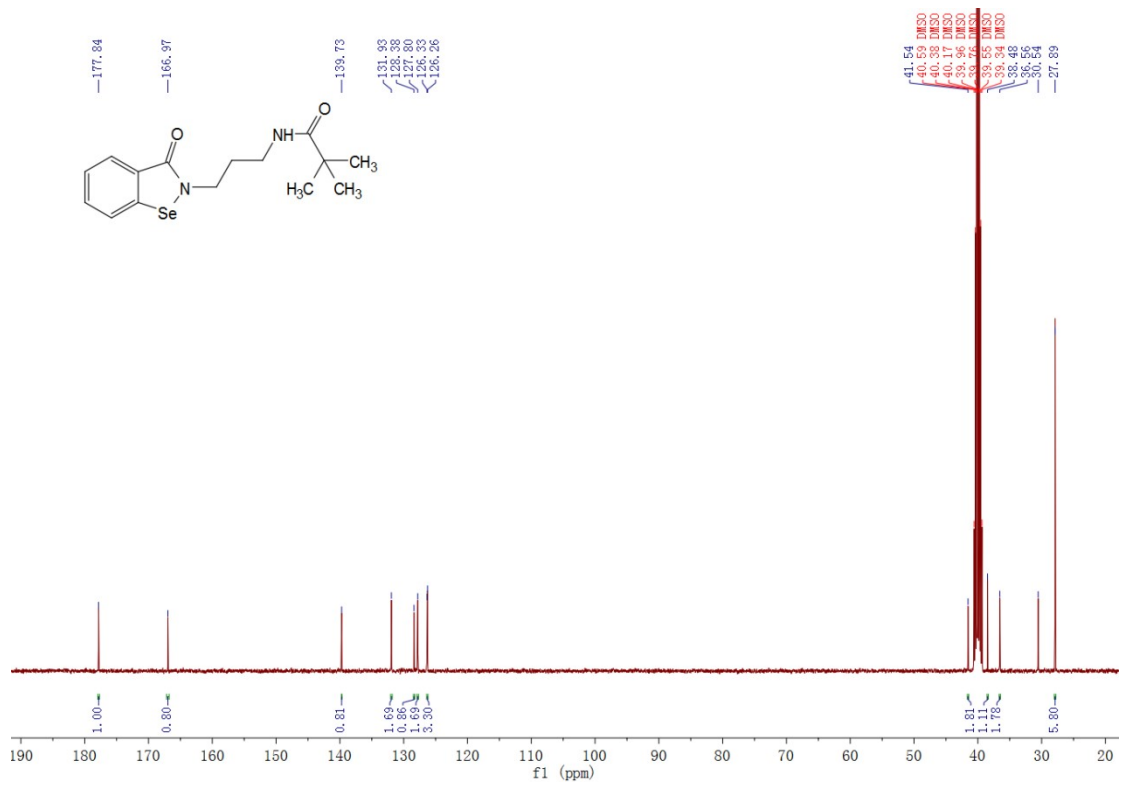



*N*-(2-(3-oxo-benzo[*d*][1,2]selenazol-2(3*H*)-yl)ethyl)dimethylsulfamide (A16)

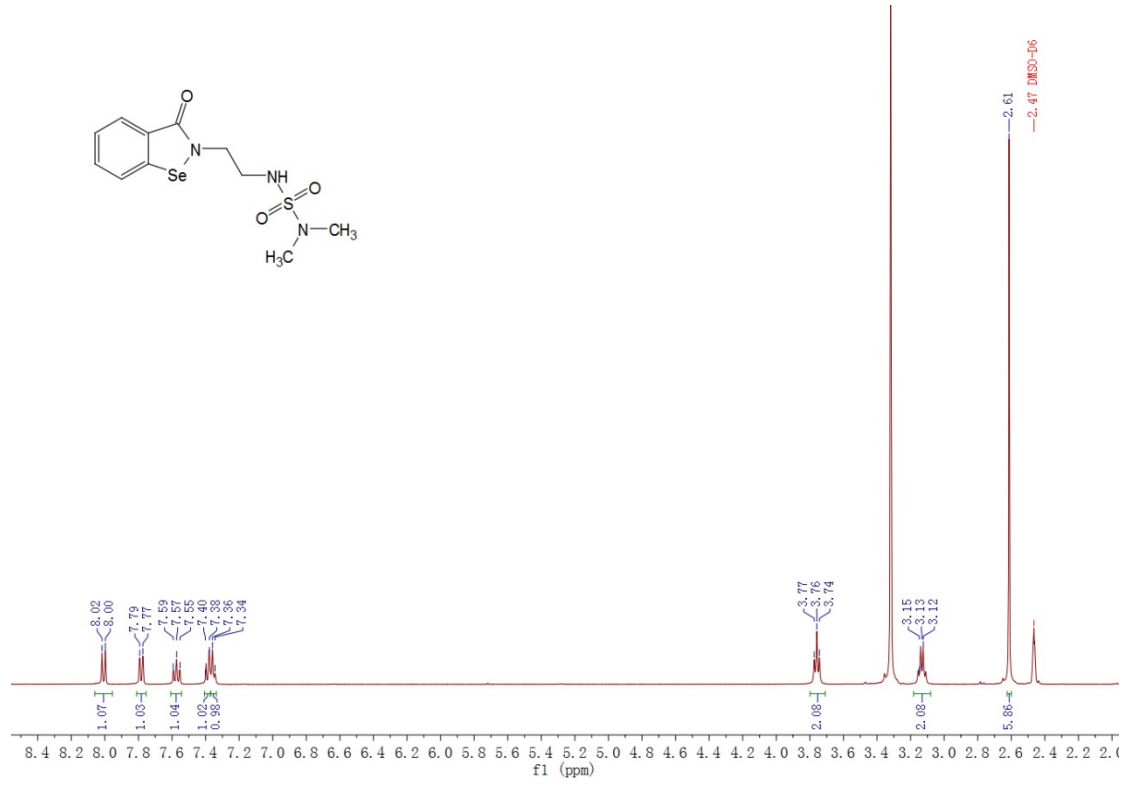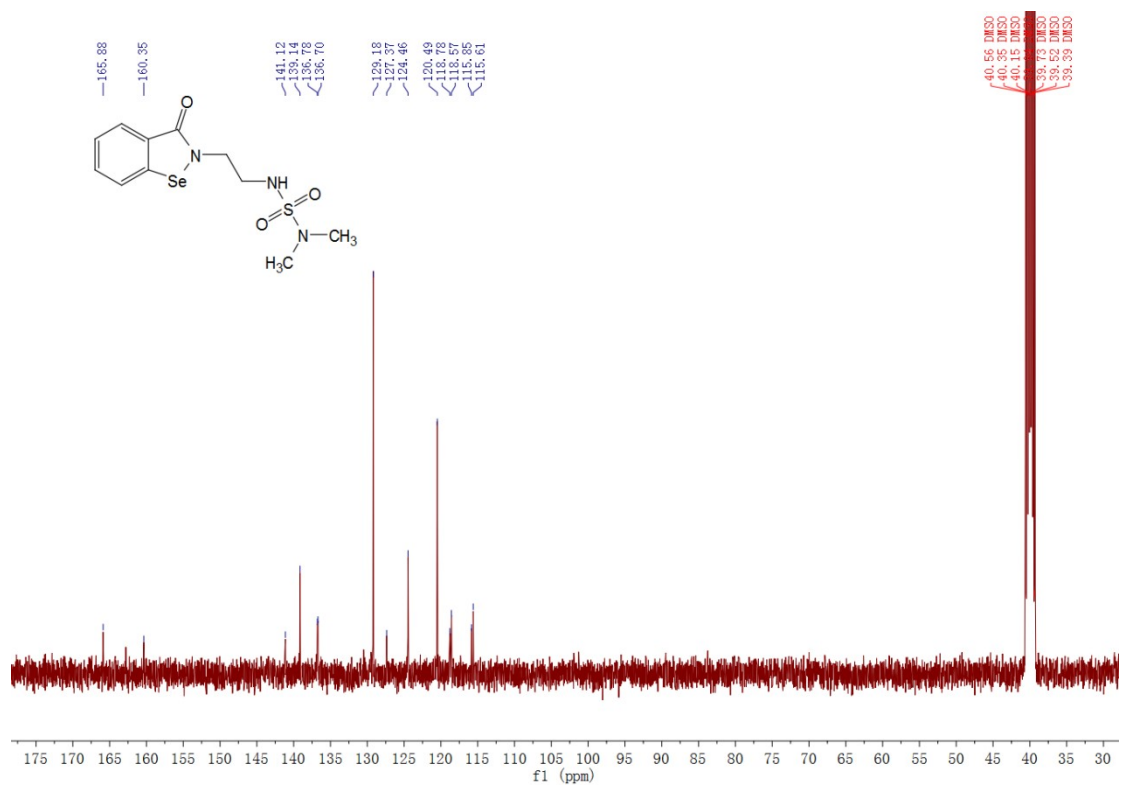

*N*-(2-(3-oxobenzod[1,2]selenazol-2(3H)-yl)ethyl)ethanesulfonamide (A17)

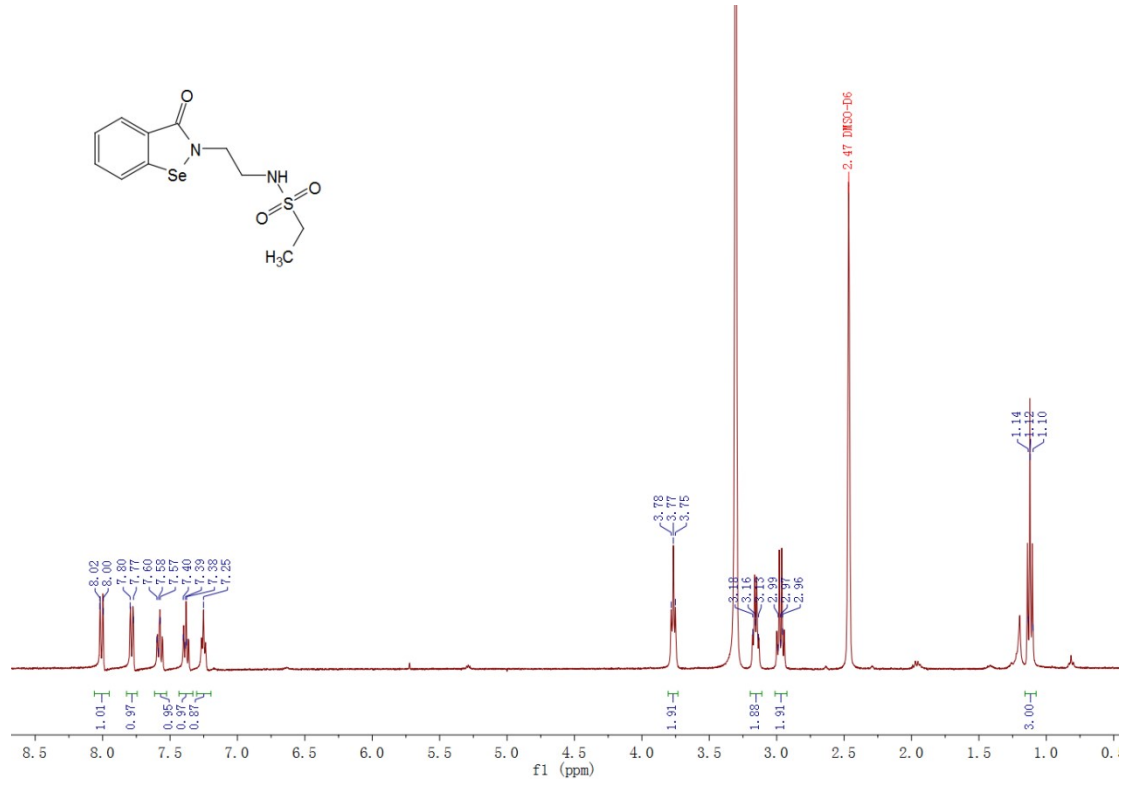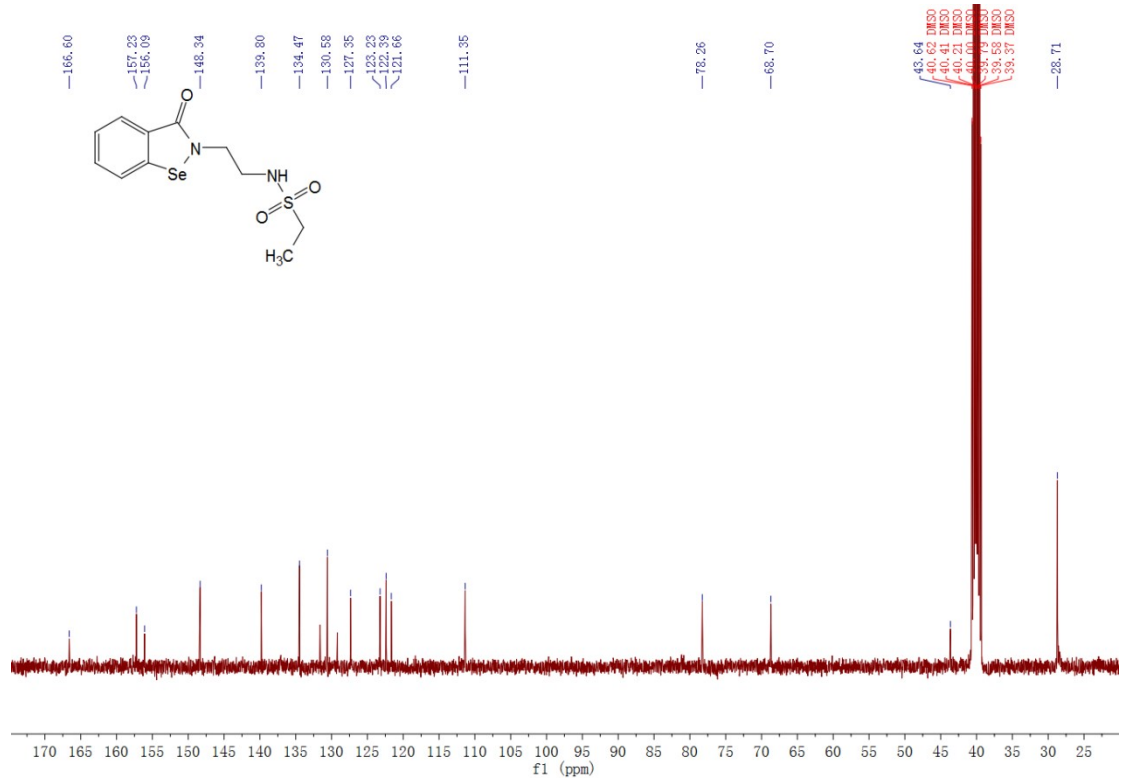

4-methoxy-N-(2-(3-oxobenzod[1,2]selenazol-2(3H)-yl)ethyl)benzenesulfonamide

(A18)

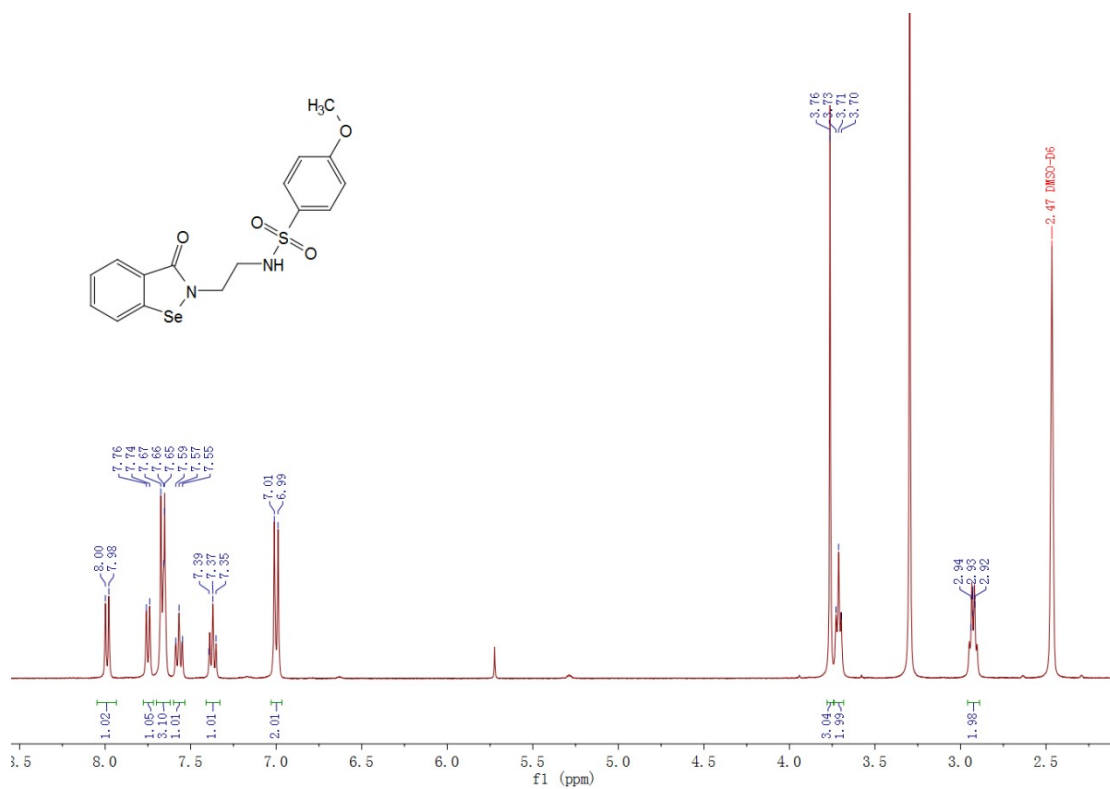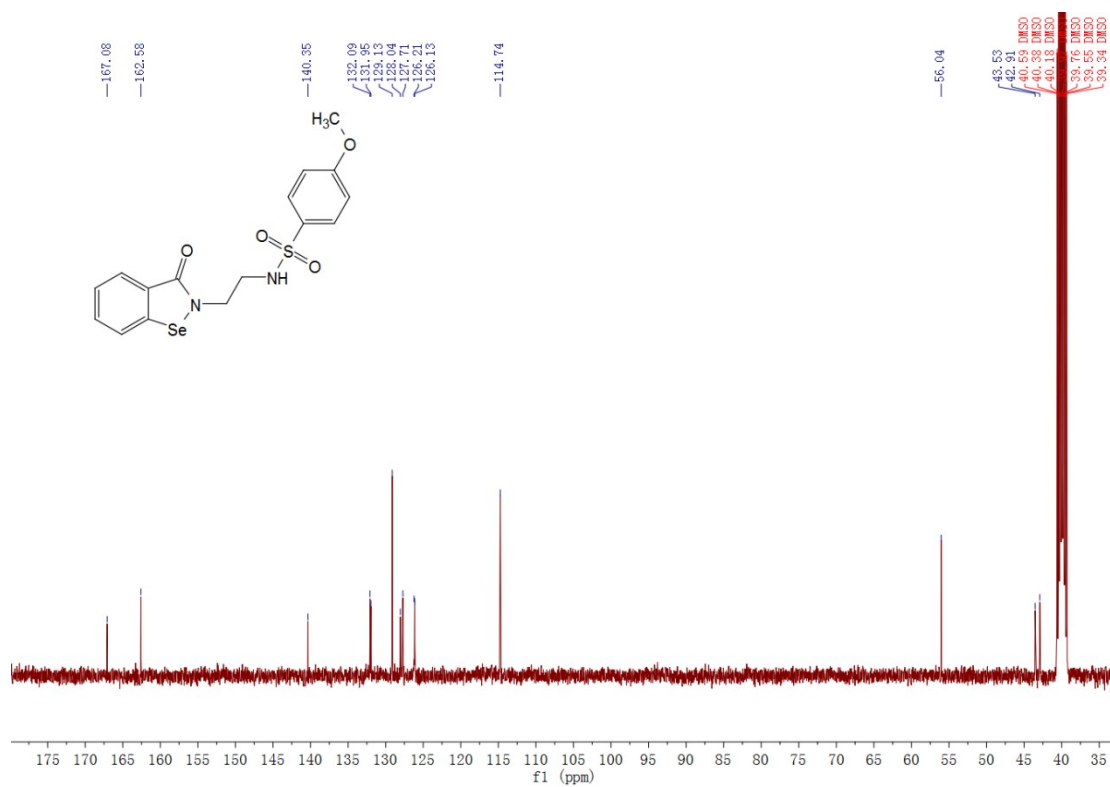

4-methyl-N-(2-(3-oxobenzo[d][1,2]selenazol-2(3H)-yl)ethyl)benzenesulfonamide

(A19)

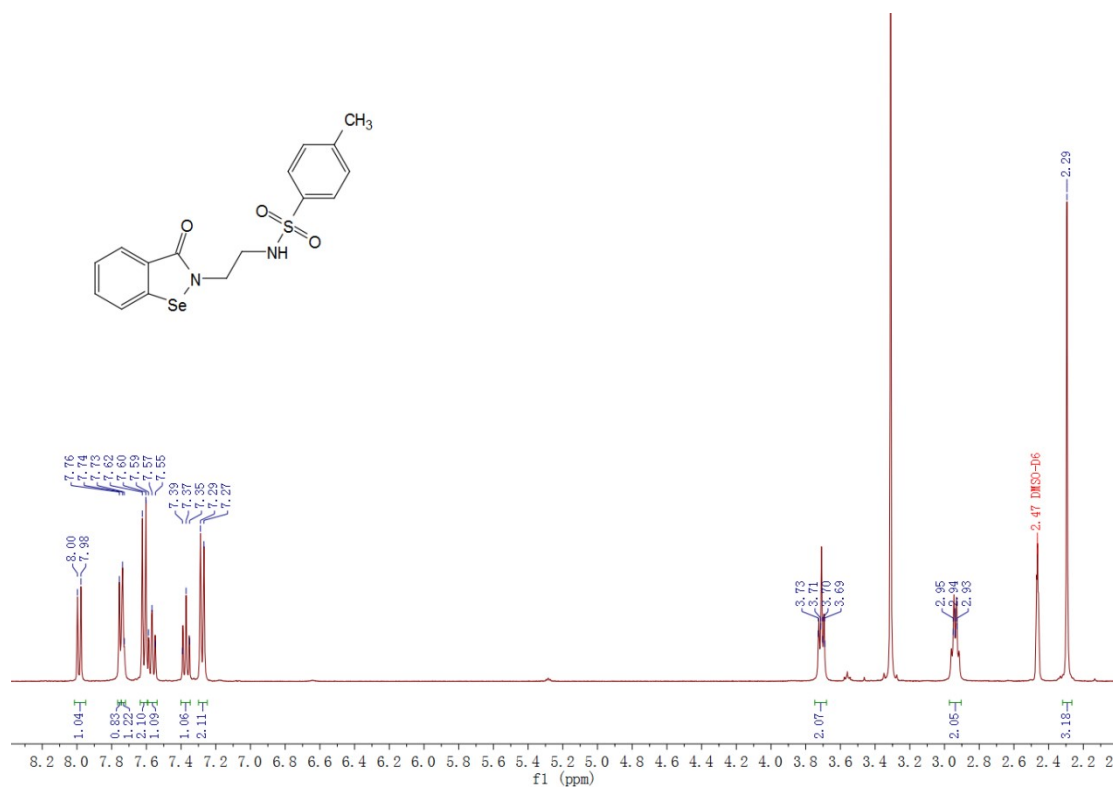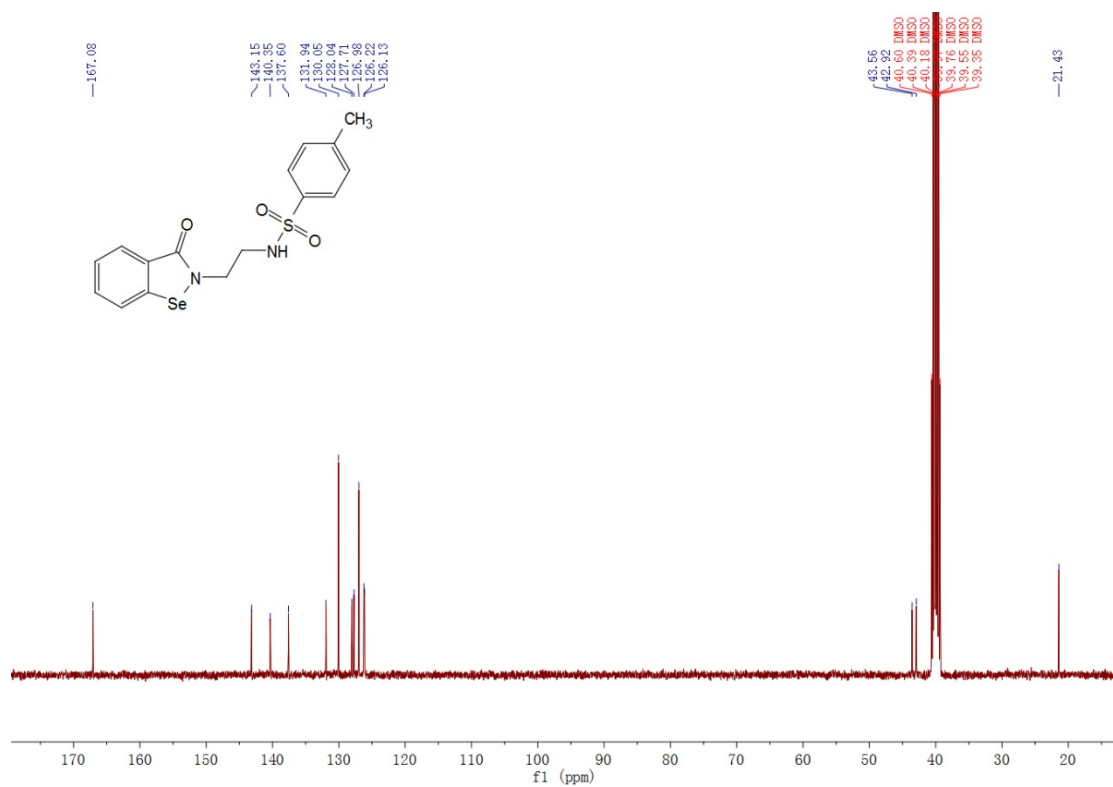

4-fluoro-N-(2-(3-oxobenzoselenazol-2(3H)-yl)ethyl)benzenesulfonamide (A20)

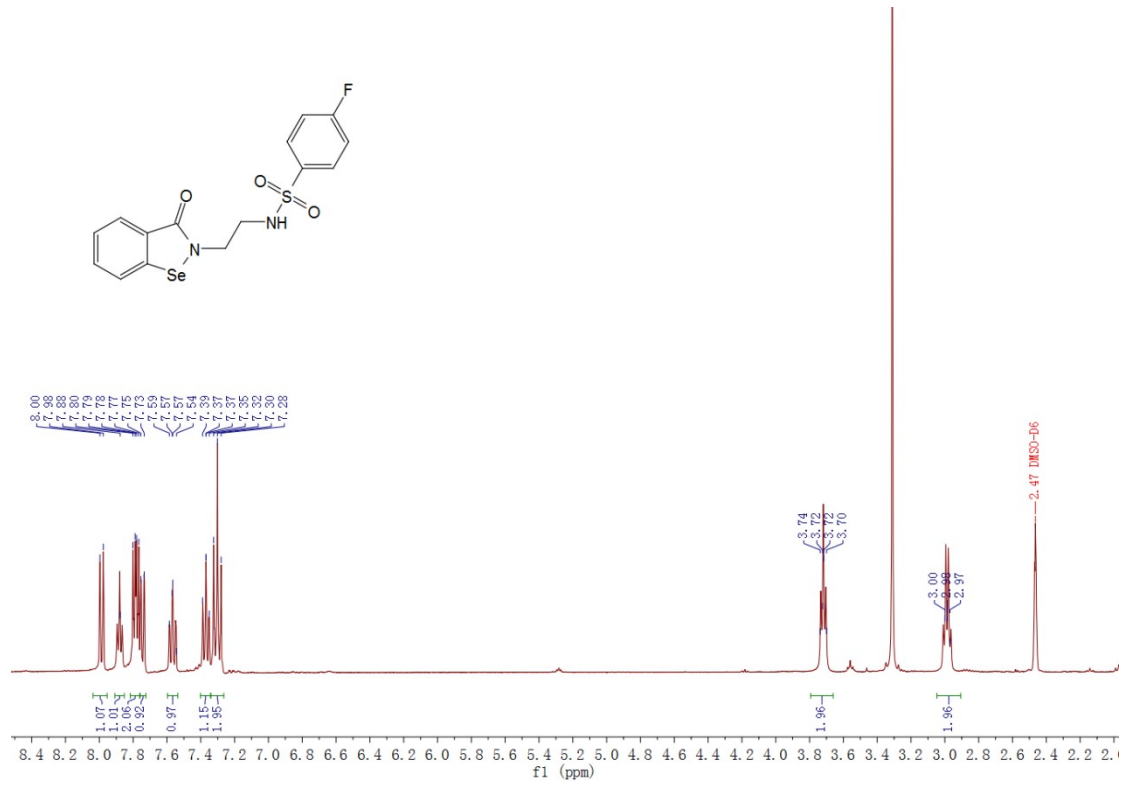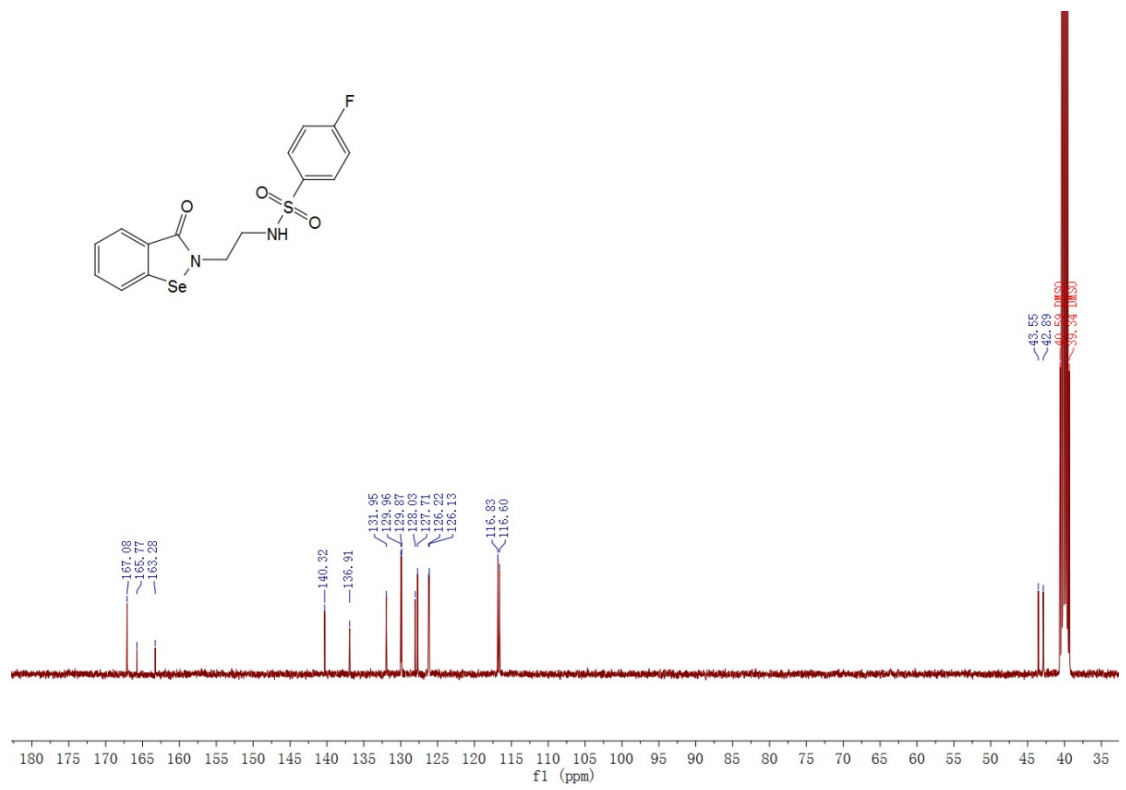

4-chloro-3-nitro-N-(2-(3-oxobenzo[d][1,2]selenazol-2(3H)-yl)ethyl)benzenesulfonamide (A21)

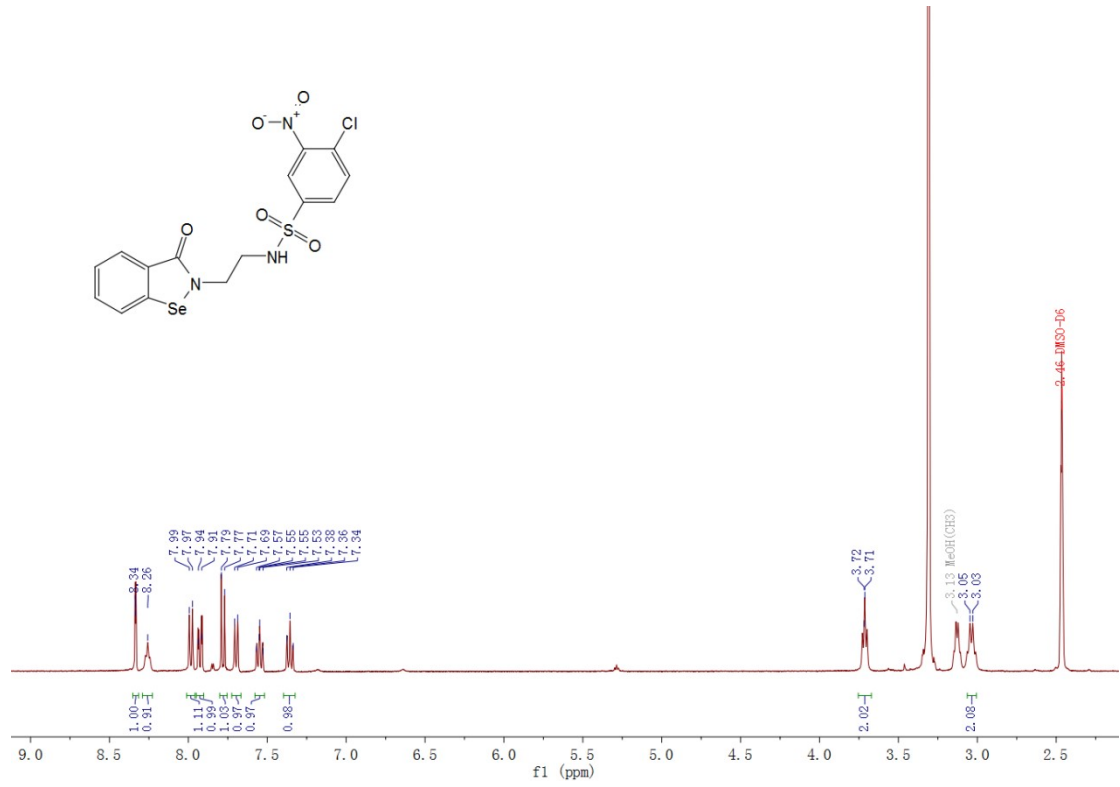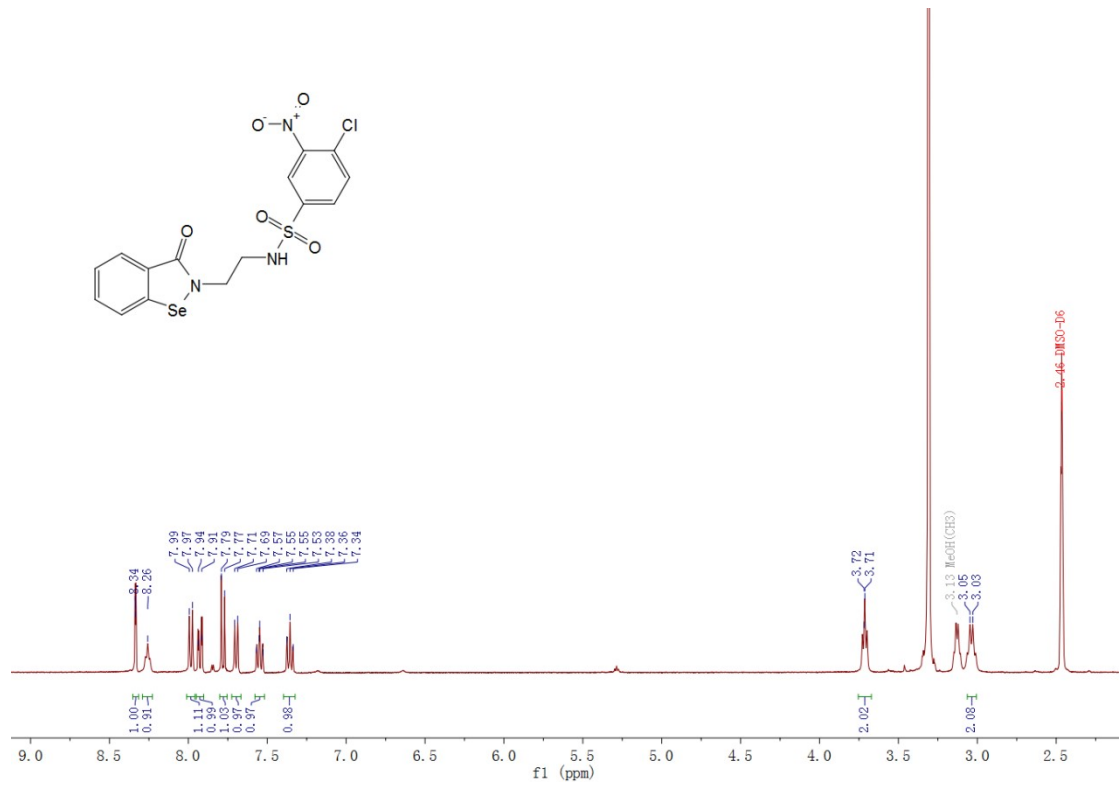

4-(tert-butyl)-N-(2-(3-oxobenzod[1,2]selenazol-2(3H)-yl)ethyl)benzenesulfonamide  
(A22)

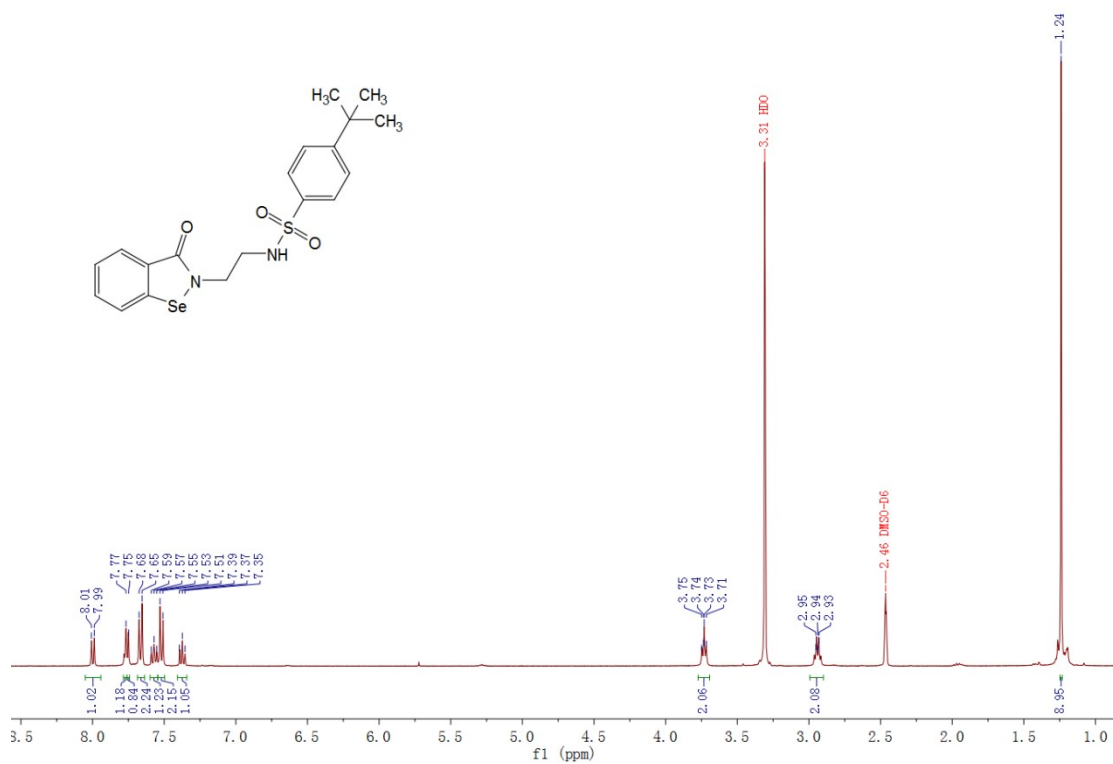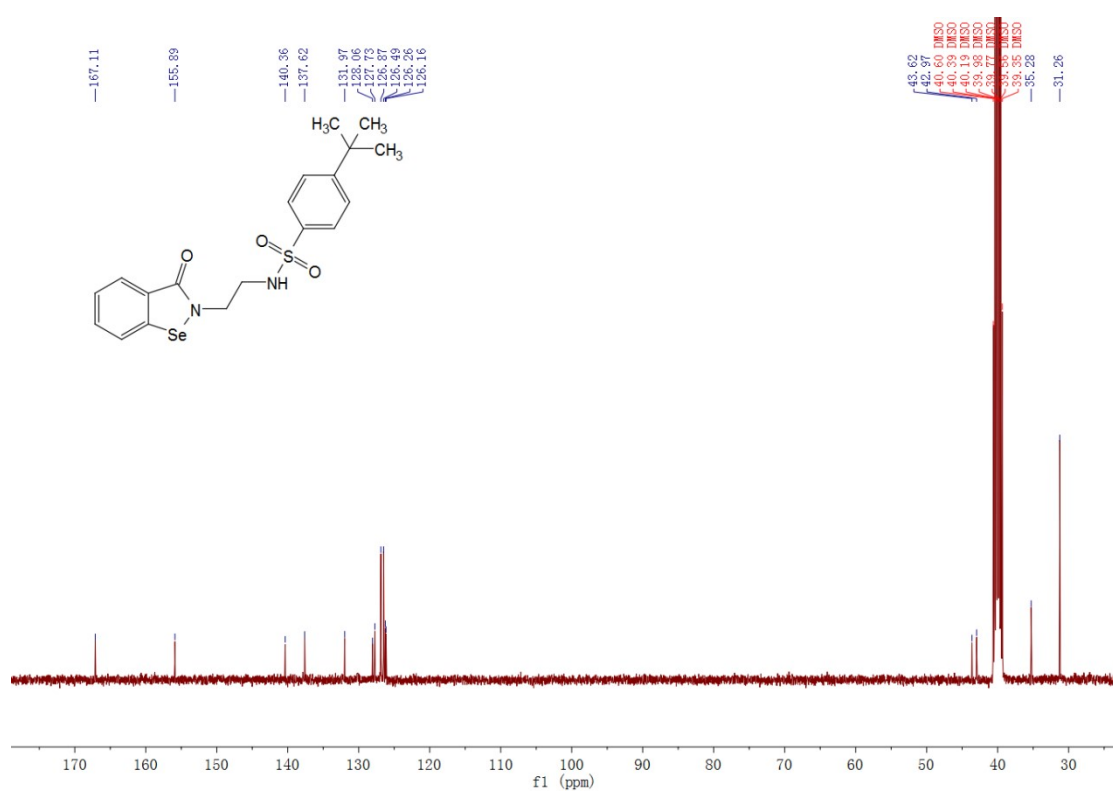

Supplement: d4md00031e1.pdf [file d4md00031e1.pdf]
